# Supplementary material for: First-line and second-line treatment of patients with metastatic pancreatic adenocarcinoma in routine clinical practice across Europe: a retrospective, observational chart review study
Source: PubMed Central journal article supplement — ESMO Open. 2020 Jan 20;5(1):e000587. doi: 10.1136/esmoopen-2019-000587 (PMC7003396; doi:10.1136/esmoopen-2019-000587), 2020-01-20
Supplement: esmoopen-2019-000587supp001.pdf [file esmoopen-2019-000587supp001.pdf]

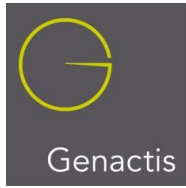

All doses capped: Min 0.1 mg – Max 1000 mg

Absolute doses non-obligatory

Adverse Event Forms and automatic notifications implemented

# Metastatic Pancreatic Adenocarcinoma Research

Patient Record (PR)

Version R – July 7<sup>th</sup> 2016 – Post pilots

Prepared for Baxalta

## Introduction

[\[SHOW ALL - Reconnection\]](#)

Dear Doctor,

Thank you for connecting to our study.

To proceed to the questions, please click button to accept the conditions.

**CONFIDENTIALITY AGREEMENT:** You acknowledge that in the course of this study, proprietary information regarding products and product development, and other trade secrets and know-how may be disclosed, and by participating in this study you agree to hold all such information confidential and to not disclose it to any third party or use it for any other purpose whatsoever. You also agree not to disclose any part of the following pages, which is proprietary material of Genactis and its client. You are required to accept the above confidentiality agreement in order to participate in this survey. Please indicate whether or not you accept:

|        |                             |
|--------|-----------------------------|
| 1. Yes | <a href="#">[CONTINUE]</a>  |
| 2. No  | <a href="#">[TERMINATE]</a> |

## PATIENT RECORD

[\[SHOW ALL\]](#)

Thank you for completing this questionnaire. You will now be directed to the Patient Record (PR) section.

The data you will provide in these records will help us to better understand your current and past treatment of metastatic pancreatic cancer patients.

Please enter data for your **last [12 in EU5 countries and 3-8 in Nordics and in NL] patients diagnosed with metastatic pancreatic adenocarcinoma**, who meet the following criteria:

For patients to be eligible for their patient record (PR) to be reported, the patient must:

- Be 18 years of age or older **and**
- Be diagnosed with metastatic pancreatic adenocarcinoma **and**
- Must have completed a first line anti-cancer treatment for metastatic disease within the last 6 to 24 months (between July 2014 and January 2016) (whether patients are currently alive or dead, and whether they still receive active treatment or not).

**Please do not select any cases as this may compromise our effort to obtain a sample that accurately represents your routine metastatic pancreatic adenocarcinoma patient load. Please report each patient only once. We do need to collect a representative proportion of 1<sup>st</sup>, 2<sup>nd</sup> and more line patients.**

**[STUDY BOARD – THIS IS A PAGE THAT DOCTORS SEE EVERYTIME THEY RE-CONNECT, AS A REMINDER]**

Dear Doctor,

The study-board below shows your progress towards completing your PRs.

For each completed PR a summary of key patient characteristics will be listed under "Patient description". This will help you to avoid entering the details for a patient more than once or to refer back to the right patient cases in the (hypothetical) event of any follow-up queries.

Please ensure you have extracted / have ready access to the relevant information from the patient's records prior to commencing completion of the online form.

| <b>[ACTIVE BUTTON: "Click here to enter a patient"]</b> |                                                                                                                |                                              |
|---------------------------------------------------------|----------------------------------------------------------------------------------------------------------------|----------------------------------------------|
| <b>Anonymous Patient list</b>                           | <b>Patient description</b><br>(year of birth / gender / current line of therapy/ most recent therapy received) | <b>Date of PR completion</b><br>(dd/mm/yyyy) |
|                                                         |                                                                                                                |                                              |

For patients to be eligible for their patient record (PR) to be reported, the patient must:

- Be 18 years of age or older **and**
- Be diagnosed with metastatic pancreatic adenocarcinoma **and**
- Must have completed a first line anti-cancer treatment for metastatic disease within the last 6 to 24 months (whether patients are currently alive or dead, and whether they still receive active treatment or not).

**[HOOK WITH PATIENT SCREENER]**

Doctor you indicated that in the last 24 months, **[RECALL SQ6]** of your patients received a first line and **[RECALL SQ7]** received a second line.

Please make sure you enter all of your 2<sup>nd</sup> Line patients.

**[SHOW ALL] SECTION 1 –UP TO PAGE 15****E0. Doctor can you please confirm that the patient you are about to enter fulfil the following criteria:**

- Be 18 years of age or older **and**
- Be diagnosed with metastatic pancreatic adenocarcinoma **and**
- Must have completed a first line anti-cancer treatment for metastatic disease within the last 6 to 24 months (whether patients are currently alive or dead, and whether they still receive active treatment or not).

|                           |                                                                                                                             |
|---------------------------|-----------------------------------------------------------------------------------------------------------------------------|
| Yes to all above criteria | <b>1</b>                                                                                                                    |
| No                        | <b>2 [If No, show error message “Doctor, this patient is not eligible for reporting an EPR” and go back to Study Board]</b> |

**E1. Date of patient’s last visit (DD/MM/YYYY):**

**[Min Value = 01/06/2014, Max Value = Today]**

**E2. Gender:**

|        |          |
|--------|----------|
| Male   | <b>1</b> |
| Female | <b>2</b> |

**E3. Current status of the patient**

|       |          |
|-------|----------|
| Alive | <b>1</b> |
| Dead  | <b>2</b> |

**E4. Date of birth DD/MM/YYYY**

**[Min=1/5/1998 and Max=1/12/1916]**

**[SHOW IF E3=2]**

**E4\_1. Date of death (DDMMYYYY)**

**[Min 1/05/2014 and Max today] [IF E4\_1 <E1 show error message]**

**[SHOW if E3=1]****E3a. What is the current treatment status?**

|                                                                                                                             |           |
|-----------------------------------------------------------------------------------------------------------------------------|-----------|
| Completed 1 <sup>st</sup> line metastatic treatment and no active treatment any longer / Best Supportive Care only          | <b>1</b>  |
| Completed 1 <sup>st</sup> line metastatic treatment ; waiting to start 2 <sup>nd</sup> line                                 | <b>2</b>  |
| In 2 <sup>nd</sup> line metastatic treatment                                                                                | <b>3</b>  |
| Completed 2 <sup>nd</sup> line and no active treatment after 2 <sup>nd</sup> line / Best Supportive Care only               | <b>4</b>  |
| Completed 2 <sup>nd</sup> line; waiting to start 3 <sup>rd</sup> line metastatic treatment                                  | <b>5</b>  |
| In 3 <sup>rd</sup> line metastatic treatment                                                                                | <b>6</b>  |
| Completed 3 <sup>rd</sup> line and no active treatment after 3 <sup>rd</sup> line / Best Supportive Care only               | <b>7</b>  |
| Completed 3 <sup>rd</sup> line; waiting to start 4 <sup>th</sup> line metastatic treatment                                  | <b>8</b>  |
| In 4 <sup>th</sup> and more line metastatic treatment or waiting to start 5 <sup>th</sup> or more line metastatic treatment | <b>9</b>  |
| No active treatment after 4 <sup>th</sup> or more line metastatic treatment any longer / Best Supportive Care only          | <b>10</b> |

**[SHOW if E3=2]****E3b. What was the last known line of therapy for this patient?**

|                                                                                                                                 |           |
|---------------------------------------------------------------------------------------------------------------------------------|-----------|
| In 1 <sup>st</sup> line metastatic treatment                                                                                    | <b>1</b>  |
| Completed 1 <sup>st</sup> line metastatic treatment and no active treatment planned / Was in Best Supportive Care               | <b>2</b>  |
| Completed 1 <sup>st</sup> line metastatic treatment ; was waiting to start 2 <sup>nd</sup> line                                 | <b>3</b>  |
| In 2 <sup>nd</sup> line metastatic treatment                                                                                    | <b>4</b>  |
| Completed 2 <sup>nd</sup> line metastatic treatment and no active treatment planned / Was in Best Supportive Care               | <b>5</b>  |
| Completed 2 <sup>nd</sup> line; was waiting to start 3 <sup>rd</sup> line metastatic treatment                                  | <b>6</b>  |
| In 3 <sup>rd</sup> line metastatic treatment                                                                                    | <b>7</b>  |
| Completed 3 <sup>rd</sup> line metastatic treatment and no active treatment planned / Was in Best Supportive Care               | <b>8</b>  |
| Completed 3 <sup>rd</sup> line; was waiting to start 4 <sup>th</sup> line metastatic treatment                                  | <b>9</b>  |
| In 4 <sup>th</sup> and more line metastatic treatment or was waiting to start 5 <sup>th</sup> or more line metastatic treatment | <b>10</b> |
| No active treatment after 4 <sup>th</sup> or more line metastatic treatment planned / Was in Best Supportive Care only          | <b>11</b> |

**Diagnosis and treatment**[\[SHOW ALL\]](#)

E5. Date of initial diagnosis of pancreatic cancer:

**[Min Value = 1/1/1980, Max Value = E5]**

E5\_1. Was the patient diagnosed with metastatic disease at the same date?

|     | Tick only one           |
|-----|-------------------------|
| Yes | <input type="radio"/> 1 |
| No  | <input type="radio"/> 2 |

[\[HIDE IF E5\\_1=1\]](#)

E6. Date when patient was diagnosed with metastatic disease:

**[Min Value > =E5, Max Value = 1/10/2015]**

[\[SHOW ALL\]](#)

E7. Patient weight at diagnosis of pancreatic cancer:   Kg

**Min Value=40, Max Value =140**

E8. Patient height

|                       |                                                                                                                            |
|-----------------------|----------------------------------------------------------------------------------------------------------------------------|
| __ cm<br>(140 to 210) | <b>[Minimum=140, Maximum=210]</b><br><b>If out of range value, SHOW ERROR MESSAGE:</b> Could you please check your answer? |
|-----------------------|----------------------------------------------------------------------------------------------------------------------------|

**E9. Symptoms present at initial diagnosis**

|                                                                                         | Tick all that apply |
|-----------------------------------------------------------------------------------------|---------------------|
| Weight loss                                                                             | <b>A</b>            |
| Jaundice                                                                                | <b>B</b>            |
| Dark urine                                                                              | <b>C</b>            |
| Steatorrhea                                                                             | <b>D</b>            |
| Itching                                                                                 | <b>E</b>            |
| Nausea                                                                                  | <b>F</b>            |
| Vomiting                                                                                | <b>G</b>            |
| Abdominal pain                                                                          | <b>H</b>            |
| Mid back pain                                                                           | <b>I</b>            |
| Bloating                                                                                | <b>J</b>            |
| Depression                                                                              | <b>K</b>            |
| Deep vein thrombosis                                                                    | <b>L</b>            |
| Recent unexpected onset of diabetes not associated with weight gain or familial history | <b>M</b>            |
| Cachexia                                                                                | <b>N</b>            |
| Diarrhea                                                                                | <b>O</b>            |
| Other (specify) <b>[INSERT OPEN END]</b>                                                | <b>P</b>            |



[\[SHOW ALL\]](#)**E10. Performance status at initial diagnosis**

| ECOG Grade | Karnofsky Grade | Tick only one           |
|------------|-----------------|-------------------------|
| 0          | 100             | <input type="radio"/> 1 |
| 1          | 80-90           | <input type="radio"/> 2 |
| 2          | 60-70           | <input type="radio"/> 3 |
| 3          | 40-50           | <input type="radio"/> 4 |
| 4          | 10-30           | <input type="radio"/> 5 |
| Unknown    |                 | <input type="radio"/> 6 |

For details on the ECOG and Karnofsky Grade, please click here. [\[INSERT LINK – APPENDIX 1\]](#)

**E11. Please indicate level at initial diagnosis**

|   |           |        |                              | To be programmed |             |
|---|-----------|--------|------------------------------|------------------|-------------|
|   |           |        |                              | MIN              | MAX         |
|   |           |        | <i>Tick if not performed</i> |                  |             |
| 1 | CA19-9    | U/ml   |                              | 0                | 5000        |
| 2 | Albumin   | g/l    |                              | 15 g/l           | 80 g/l      |
| 3 | Bilirubin | IU/L   |                              | 0.1 IU/l         | 30,000 IU/L |
|   |           | µmol/l |                              | 5 µmol /l        | 700 µmol/l  |

**IF OUTSIDE RANGES: Can you please confirm this value?**

**YES / NO [IF YES GO TO NEXT QUESTION, IF NO GO BACK TO E11]**

[\[SHOW ALL\]](#)

E12. How was initial diagnosis established? (please tick all that apply)

|                                                                             | Tick all that apply        |
|-----------------------------------------------------------------------------|----------------------------|
| CT Scan                                                                     | <input type="checkbox"/> A |
| MRI                                                                         | <input type="checkbox"/> B |
| EUS (Endoscopic ultrasound)                                                 | <input type="checkbox"/> C |
| ERCP (Endoscopic retrograde cholangiography and pancreatography)            | <input type="checkbox"/> D |
| Core needle biopsy (CNB)                                                    | <input type="checkbox"/> E |
| Biopsy of primary tumour                                                    | <input type="checkbox"/> F |
| Biopsy of metastases                                                        | <input type="checkbox"/> G |
| Other <a href="#">[If ticked show open answer]</a><br>Please specify: _____ | <input type="checkbox"/> H |

E13. Location of primary tumour within the pancreas

|            | Tick only one           |
|------------|-------------------------|
| Head       | <input type="radio"/> 1 |
| Body       | <input type="radio"/> 2 |
| Tail       | <input type="radio"/> 3 |
| Head/Body  | <input type="radio"/> 4 |
| Body/Tail  | <input type="radio"/> 5 |
| Don't know | <input type="radio"/> 6 |

[\[SHOW all\]](#)**E14. Indicate the subtype of adenocarcinoma**

|                                      | Tick only one           |
|--------------------------------------|-------------------------|
| Ductal adenocarcinoma                | <input type="radio"/> 1 |
| Intraductal papillary adenocarcinoma | <input type="radio"/> 2 |
| Cystadenocarcinoma                   | <input type="radio"/> 3 |
| Other                                | <input type="radio"/> 4 |
| Unknown                              | <input type="radio"/> 5 |

**E14\_1. Indicate**

|                  | Tick only one           |
|------------------|-------------------------|
| Genetic form     | <input type="radio"/> 1 |
| Non-genetic form | <input type="radio"/> 2 |

**E15. Indicate Grading**

|         | Tick only one           |
|---------|-------------------------|
| G1      | <input type="radio"/> 1 |
| G2      | <input type="radio"/> 2 |
| G3      | <input type="radio"/> 3 |
| Unknown | <input type="radio"/> 4 |

[HIDE IF E5\_1=1]

E16. Stage of pancreatic cancer at initial diagnosis

|                             | Tick only one           |
|-----------------------------|-------------------------|
| Stage 0 (Tis, N0, M0)       | <input type="radio"/> 1 |
| Stage IA (T1, N0, M0)       | <input type="radio"/> 2 |
| Stage IB (T2, N0, M0)       | <input type="radio"/> 3 |
| Stage IIA (T3, N0, M0)      | <input type="radio"/> 4 |
| Stage IIB (T1-3, N1, M0)    | <input type="radio"/> 5 |
| Stage III (T4, any N, M0)   | <input type="radio"/> 6 |
| Stage IV (any T, any N, M1) | <input type="radio"/> 7 |
| Unstaged / don't know       | <input type="radio"/> 8 |

[SHOW ALL]

## E17. Please indicate the type of invasion at initial diagnosis:

|                         | Tick all that apply        |
|-------------------------|----------------------------|
| Perineural              | <input type="checkbox"/> A |
| Vascular                | <input type="checkbox"/> B |
| Lymphatic               | <input type="checkbox"/> C |
| Mixed                   | <input type="checkbox"/> D |
| Other                   | <input type="checkbox"/> E |
| Unknown / not available | <input type="checkbox"/> F |
| Not applicable          | <input type="checkbox"/> G |

[SHOW if E16= 1,2,3,4,5, 6, or 8]

E18. IF non metastatic disease, was the primary tumour resectable?

|                                                            | Tick only one           |
|------------------------------------------------------------|-------------------------|
| Resectable                                                 | <input type="radio"/> 1 |
| Borderline resectable                                      | <input type="radio"/> 2 |
| Locally advanced unresectable [SHOW IF E16=4, 5 OR 6 OR 8] | <input type="radio"/> 3 |

[SHOW IF E18= 1 OR 2]

E19. Has the primary tumour been resected?

|     | Tick only one           |
|-----|-------------------------|
| Yes | <input type="radio"/> 1 |
| No  | <input type="radio"/> 2 |

Patient Record

## E19\_1. [SHOW IF E19= 2]

Why was the primary tumour not resected?

|                                                                                                                | Tick all that apply |
|----------------------------------------------------------------------------------------------------------------|---------------------|
| Not considered resectable before surgery (tumour growth or progression e.g.)                                   | A                   |
| Not considered resectable after neoadjuvant treatment (tumour not shrunken, tumour growth or progression e.g.) | B                   |
| During exploration not considered resectable                                                                   | C                   |
| Patient's preference                                                                                           | D                   |
| Frailty                                                                                                        | E                   |
| Age                                                                                                            | F                   |
| Medical contraindication for surgery                                                                           | G                   |
| Performance status                                                                                             | H                   |
| Other. [If ticked show open answer]<br>Please specify: _____                                                   | I                   |

## [SHOW IF E19 =1]

E19\_2. What was the outcome of the resection?

|                 | Tick only one           |
|-----------------|-------------------------|
| R0              | <input type="radio"/> 1 |
| R1              | <input type="radio"/> 2 |
| R2              | <input type="radio"/> 3 |
| Outcome unknown | <input type="radio"/> 4 |

## [SHOW IF E19 =1]

E19\_3. Date of the resection

|  |  |  |  |  |  |  |  |  |  |
|--|--|--|--|--|--|--|--|--|--|
|  |  |  |  |  |  |  |  |  |  |
|--|--|--|--|--|--|--|--|--|--|

[Min Value = E5, Max Value = E6]

[SHOW IF E18= 1 OR 2]

E20. Did the patient receive neoadjuvant therapy?

|     | Tick only one           |
|-----|-------------------------|
| Yes | <input type="radio"/> 1 |
| No  | <input type="radio"/> 2 |

[SHOW if E20= 1]

E20\_1. Did the patient receive radiotherapy in neoadjuvant treatment?

|     | Tick only one           |
|-----|-------------------------|
| Yes | <input type="radio"/> 1 |
| No  | <input type="radio"/> 2 |

[SHOW IF E19= 1 ]

E21. Did the patient receive adjuvant therapy following surgery?

|     | Tick only one           |
|-----|-------------------------|
| Yes | <input type="radio"/> 1 |
| No  | <input type="radio"/> 2 |

[SHOW IF E20=1] [SECTION 2 –UP TO PAGE 28](#)

## NEOADJUVANT TREATMENT

|  |  |  |  |  |  |  |  |  |  |
|--|--|--|--|--|--|--|--|--|--|
|  |  |  |  |  |  |  |  |  |  |
|--|--|--|--|--|--|--|--|--|--|

E22. Start date of treatment (DD/MM/YYYY)

[Min E5 ; Max E19\_3] [OR max E6 if no resection]

E23. End date of the treatment (DD/MM/YYYY)

|  |  |  |  |  |  |  |  |  |  |
|--|--|--|--|--|--|--|--|--|--|
|  |  |  |  |  |  |  |  |  |  |
|--|--|--|--|--|--|--|--|--|--|

[Min >=E22; Max E19\_3] [OR max E6 if no resection]

E24. What chemotherapeutic treatment did the patient receive as neoadjuvant therapy? Please select if one of the regimen below was used

|                                                  | <i>Tick only one</i>     |
|--------------------------------------------------|--------------------------|
| FOLFIRINOX (5-FU/LV – irinotecan - oxaliplatin)  | <input type="radio"/> 1  |
| mFOLFIRINOX (5-FU/LV – irinotecan - oxaliplatin) | <input type="radio"/> 2  |
| FOLFOX4 (oxaliplatin - 5-FU/LV)                  | <input type="radio"/> 3  |
| FOLFOX6 (oxaliplatin - 5-FU/LV)                  | <input type="radio"/> 4  |
| mFOLFOX6 (oxaliplatin - 5-FU/LV)                 | <input type="radio"/> 5  |
| FOLFOX7 (oxaliplatin - 5-FU/LV)                  | <input type="radio"/> 6  |
| mFOLFOX7 (oxaliplatin - 5-FU/LV)                 | <input type="radio"/> 7  |
| OFF (oxaliplatin - 5-FU/LV)                      | <input type="radio"/> 8  |
| FOLFIRI-1 (irinotecan - 5-FU/LV)                 | <input type="radio"/> 9  |
| FOLFIRI-3 (irinotecan - 5-FU/LV)                 | <input type="radio"/> 10 |
| IFF (irinotecan - 5-FU/LV)                       | <input type="radio"/> 11 |
| 5-FU/LV                                          | <input type="radio"/> 12 |
| Capecitabine - oxaliplatin                       | <input type="radio"/> 13 |
| Capecitabine monotherapy                         | <input type="radio"/> 14 |
| Gemcitabine - nab-paclitaxel                     | <input type="radio"/> 15 |
| Gemcitabine - erlotinib                          | <input type="radio"/> 16 |
| Gemcitabine – capecitabine                       | <input type="radio"/> 17 |
| Gemcitabine - oxaliplatin                        | <input type="radio"/> 18 |
| Gemcitabine - cisplatin                          | <input type="radio"/> 19 |
| Gemcitabine monotherapy                          | <input type="radio"/> 20 |
| None of the above                                | <input type="radio"/> 21 |



**[Show if E24 = 21]**

**E25. Please select what chemotherapeutic treatment the patient received as neoadjuvant therapy.**

**Select as many agents as it applies. If you only select one compound, we understand that you used it in monotherapy.**

|                     | <i>Tick all that apply</i> |
|---------------------|----------------------------|
| Paclitaxel          | <b>A</b>                   |
| Gemcitabine         | <b>B</b>                   |
| Capecitabine        | <b>C</b>                   |
| nab-paclitaxel      | <b>D</b>                   |
| 5-FU/LV             | <b>E</b>                   |
| Irinotecan          | <b>F</b>                   |
| Cisplatin           | <b>G</b>                   |
| Oxaliplatin         | <b>H</b>                   |
| S1                  | <b>I</b>                   |
| Erlotinib           | <b>J</b>                   |
| Other specify _____ | <b>K [Insert Open end]</b> |
| Other specify _____ | <b>L [Insert Open end]</b> |
| Other specify _____ | <b>M [Insert Open end]</b> |
| Other specify _____ | <b>N [Insert Open end]</b> |
| Other specify _____ | <b>o[Insert Open end]</b>  |

**IF E25K, E25L E25M, E25N OR E25 O = naI-IRI or Onivid or MM-398 HOOK for potential AE**

[SHOW IF E24=1 to 12] [All doses MIN 0.1 – MAX

**E24\_0. Confirmation of regimens (selected in E24)**

| E24_1                                | Please confirm the regimen                                                                                                                                                                                                                                                                                                                                                                                                                                                                                                                                                                                                                                        | Absolute dose given in the first cycle<br>(Please indicate for each product)            |
|--------------------------------------|-------------------------------------------------------------------------------------------------------------------------------------------------------------------------------------------------------------------------------------------------------------------------------------------------------------------------------------------------------------------------------------------------------------------------------------------------------------------------------------------------------------------------------------------------------------------------------------------------------------------------------------------------------------------|-----------------------------------------------------------------------------------------|
| <b>FOLFIRINOX</b><br>SHOW IF E24=1]  | Oxaliplatin 85mg/m <sup>2</sup> IV d1; LV 400 mg/m <sup>2</sup> IV d1; Irinotecan 180mg/m <sup>2</sup> IV d1; 5-FU 400mg/m <sup>2</sup> bolus d1; 5-FU 2400mg/m <sup>2</sup> civ d1 over 46 h, every 2 weeks<br><br><input type="checkbox"/> I confirm I used the above regimen [show absolute dose column]<br><input type="checkbox"/> I did not use exactly this regimen [GO TO E26 (dosing changes)]                                                                                                                                                                                                                                                           | Oxaliplatin _____ mg<br>LV _____ mg<br>5FU _____ mg<br>Irinotecan _____ mg<br>GO TO E27 |
| <b>mFOLFIRINOX</b><br>SHOW IF E24=2] | <input type="checkbox"/> Oxaliplatin 85mg/m <sup>2</sup> IV d1; LV 400 mg/m <sup>2</sup> IV d1; Irinotecan 180mg/m <sup>2</sup> IV d1; 5-FU 2400mg/m <sup>2</sup> civ d1 over 46 h, every 2 weeks [If ticked show absolute dose column]<br><br><input type="checkbox"/> Oxaliplatin 85 mg/m <sup>2</sup> IV 2h; LV 400 mg/m <sup>2</sup> IV 2h; Irinotecan 135 mg/m <sup>2</sup> IV 1,5h; 5-FU 300mg/m <sup>2</sup> IV bolus, then 2400 mg/m <sup>2</sup> civ over 46h, every 2 weeks<br><br>[If one of the above option ticked, then show absolute dose column]<br><br><input type="checkbox"/> I did not use any of these regimens [GO TO E26 (dosing changes)] | Oxaliplatin _____ mg<br>LV _____ mg<br>5FU _____ mg<br>Irinotecan _____ mg<br>GO TO E27 |
| <b>FOLFOX4</b><br>SHOW IF E24=3]     | Oxaliplatin 85 mg/m <sup>2</sup> IV 2h d1; LV 200 mg/m <sup>2</sup> IV 2h d1 and 2; 5-FU 400 mg/m <sup>2</sup> bolus + 600 mg/m <sup>2</sup> civ 22h d1 and 2, every 2 weeks<br><br><input type="checkbox"/> I confirm I used the above regimen [show absolute dose column]<br><input type="checkbox"/> I did not use exactly this regimen [GO TO E26 (dosing changes)]                                                                                                                                                                                                                                                                                           | Oxaliplatin _____ mg<br>LV _____ mg<br>5FU _____ mg<br>GO TO E27                        |
| <b>FOLFOX6</b><br>SHOW IF E24=4]     | Oxaliplatin 100 mg/m <sup>2</sup> IV 2h d1 and 2; LV 400 mg/m <sup>2</sup> IV 2h d1 and 2; 5-FU 400 mg/m <sup>2</sup> bolus d1 and 2; 5-FU 2400 mg/m <sup>2</sup> civ 46h every 2 weeks.<br><br><input type="checkbox"/> I confirm I used the above regimen [show absolute dose column]<br><input type="checkbox"/> I did not use exactly this regimen [GO TO E26 (dosing changes)]                                                                                                                                                                                                                                                                               | Oxaliplatin _____ mg<br>LV _____ mg<br>5FU _____ mg<br>GO TO E27                        |
| <b>mFOLFOX6</b>                      | oxaliplatin 85 mg/m <sup>2</sup> IV d1; LV 200 mg/m <sup>2</sup> d1, 5-FU 400 mg/m <sup>2</sup> bolus d1 + 2,400 mg/m <sup>2</sup> civ 46h, every 2 weeks<br><br><input type="checkbox"/> I confirm I used the above regimen [show absolute dose column]                                                                                                                                                                                                                                                                                                                                                                                                          | Oxaliplatin _____ mg<br>LV _____ mg<br>5FU _____ mg                                     |

|                                                |                                                                                                                                                                                                                                                                                                                                                                                                                                                                                              |                                                                                              |
|------------------------------------------------|----------------------------------------------------------------------------------------------------------------------------------------------------------------------------------------------------------------------------------------------------------------------------------------------------------------------------------------------------------------------------------------------------------------------------------------------------------------------------------------------|----------------------------------------------------------------------------------------------|
| <b>SHOW IF E24=5]</b>                          | <input type="checkbox"/> I did not use exactly this regimen <b>[GO TO (E26 (dosing changes))]</b>                                                                                                                                                                                                                                                                                                                                                                                            | <b>GO TO E27</b>                                                                             |
| <b>FOLFOX7</b><br><br><b>SHOW IF E24=6]</b>    | oxaliplatin 130 mg/m <sup>2</sup> IV 2h d1; LV 400 mg/m <sup>2</sup> IV 2h d1; 5-FU 400 mg/m <sup>2</sup> bolus d1; 5-FU 2,400 mg/m <sup>2</sup> civ 46h, every 2 weeks<br><br><input type="checkbox"/> I confirm I used the above regimen [show absolute dose column]<br><br><input type="checkbox"/> I did not use exactly this regimen <b>[GO TO (E26 (dosing changes))]</b>                                                                                                              | <b>Oxaliplatin _____ mg</b><br><b>LV _____ mg</b><br><b>5FU _____ mg</b><br><b>GO TO E27</b> |
| <b>mFOLFOX7</b><br><br><b>SHOW IF E24=7]</b>   | oxaliplatin 85 mg/m <sup>2</sup> IV 2h d1; LV 200 mg/m <sup>2</sup> IV 2h d1; 5-FU 2400 mg/m <sup>2</sup> civ 46h, every 2 weeks<br><br><input type="checkbox"/> I confirm I used the above regimen [show absolute dose column]<br><br><input type="checkbox"/> I did not use exactly this regimen <b>[GO TO (E26 (dosing changes))]</b>                                                                                                                                                     | <b>Oxaliplatin _____ mg</b><br><b>LV _____ mg</b><br><b>5FU _____ mg</b><br><b>GO TO E27</b> |
| <b>OFF</b><br><br><b>SHOW IF E24=8]</b>        | Oxaliplatin 85 mg/m <sup>2</sup> IV d8 and 22; 5-FU 2000 mg/m <sup>2</sup> civ 24h d1, 8, 15, 22; LV 200 mg/m <sup>2</sup> IV d1, 8, 15, and 22, every 6 weeks.<br><br><input type="checkbox"/> I confirm I used the above regimen [show absolute dose column]<br><input type="checkbox"/> I did not use exactly this regimen <b>[GO TO (E26 (dosing changes))]</b>                                                                                                                          | <b>Oxaliplatin _____ mg</b><br><b>LV _____ mg</b><br><b>5FU _____ mg</b><br><b>GO TO E27</b> |
| <b>FOLFIRI-1</b><br><br><b>SHOW IF E24=9]</b>  | Irinotecan 180 mg/m <sup>2</sup> 2 IV d1; LV 400 mg/m <sup>2</sup> 2 IV d1; 5-FU 400 mg/m <sup>2</sup> 2 IV bolus d1; 5-FU 2400 mg/m <sup>2</sup> 2 civ 46, every 2 weeks<br><br><input type="checkbox"/> I confirm I used the above regimen [show absolute dose column]<br><input type="checkbox"/> I did not use exactly this regimen <b>[GO TO (E26 (dosing changes))]</b>                                                                                                                | <b>Irinotecan _____ mg</b><br><b>LV _____ mg</b><br><b>5FU _____ mg</b><br><b>GO TO E27</b>  |
| <b>FOLFIRI-3</b><br><br><b>SHOW IF E24=10]</b> | irinotecan 100 mg/m <sup>2</sup> 2 IV d1; LV 400 mg/m <sup>2</sup> 2 IV d1; 5-FU 2000 mg/m <sup>2</sup> 2 civ 46, every 2 weeks<br><br><input type="checkbox"/> I confirm I used the above regimen [show absolute dose column]<br><input type="checkbox"/> I did not use exactly this regimen <b>[GO TO (E26 (dosing changes))]</b>                                                                                                                                                          | <b>Irinotecan _____ mg</b><br><b>LV _____ mg</b><br><b>5FU _____ mg</b><br><b>GO TO E27</b>  |
| <b>5FU / LV</b><br><br><b>SHOW IF E24=12]</b>  | <input type="checkbox"/> <b>de Gramont</b><br><br>LV 200 mg/m <sup>2</sup> IV bolus, 5-FU bolus 400 mg/m <sup>2</sup> IV; 5-FU 600 mg/m <sup>2</sup> civ d1 and 2, every 2 weeks<br><br><input type="checkbox"/> <b>Mayo clinic regimen</b><br><br>5-FU 425 mg/m <sup>2</sup> IV bolus d1-5; LV 20 mg/m <sup>2</sup> IV bolus d1-5, every 4 weeks<br><br><input type="checkbox"/> <b>Nordic FLV</b><br><br>5-FU 500 mg/m <sup>2</sup> bolus; LV 60 mg/m <sup>2</sup> d1 and 2, every 2 weeks | <b>LV _____ mg</b><br><b>5FU _____ mg</b><br><b>GO TO E27</b>                                |

|  |                                                                                                                                                                               |  |
|--|-------------------------------------------------------------------------------------------------------------------------------------------------------------------------------|--|
|  | <p><b>[If one of the above option ticked, then show absolute dose column]</b></p> <p><input type="checkbox"/> Other 5FU/LV regimens <b>[GO TO (E26 (dosing changes))]</b></p> |  |
|--|-------------------------------------------------------------------------------------------------------------------------------------------------------------------------------|--|

[SHOW IF E20=1] [SHOW IF E24=11 to 21 AND E25 ticked]

FOR PROGRAMMING PURPOSES, EACH REGIMEN IN E24 IS SPLIT INTO E25 VARIABLES.

E26. INITIAL DOSE AND FREQUENCY REGIMEN

| To be reported in all other dosing tables | Dose:<br>[Only one unit per dose / compulsory]                                                                       | Frequency                                                                                                                                                                                                                                                                                                                      | Other Frequency (not listed), please specify | Absolute dose given in the first cycle |
|-------------------------------------------|----------------------------------------------------------------------------------------------------------------------|--------------------------------------------------------------------------------------------------------------------------------------------------------------------------------------------------------------------------------------------------------------------------------------------------------------------------------|----------------------------------------------|----------------------------------------|
| Paclitaxel<br>SHOW IF E25=A]              | Dose: _____<br><input type="checkbox"/> mg / m2                                                                      | <input type="checkbox"/> weekly<br><input type="checkbox"/> every 3 weeks<br><input type="checkbox"/> other (specify)                                                                                                                                                                                                          | Open-end                                     | Total mg<br>_____ mg                   |
| Gemcitabine<br>SHOW IF E25=B]             | Dose: _____<br><input type="checkbox"/> mg / m2                                                                      | <input type="checkbox"/> once weekly week 1-7 (rest week 8), followed by once weekly week 1-3 every 4 weeks<br><input type="checkbox"/> day 1, 8 and 15 every 4 weeks<br><input type="checkbox"/> day 1 and 8 every 3 weeks<br><input type="checkbox"/> day 1 and 15 every 4 weeks<br><input type="checkbox"/> other (specify) | Open-end                                     | Total mg<br>_____ mg                   |
| Capecitabine<br>SHOW IF E25=C]            | Dose: _____<br><input type="checkbox"/> mg / m2<br>If flat dose is used, please tick:<br><input type="checkbox"/> mg | <input type="checkbox"/> twice daily d1-d14 every 3 weeks<br><input type="checkbox"/> twice daily d1-d21 every 3 weeks<br><input type="checkbox"/> other (specify)                                                                                                                                                             | Open-end                                     | Total mg<br>_____ mg                   |
| Nab-paclitaxel<br>SHOW IF E25=D]          | Dose: _____<br><input type="checkbox"/> mg / m2                                                                      | <input type="checkbox"/> day 1, 8 and 15 every 4 weeks<br><input type="checkbox"/> other (specify)                                                                                                                                                                                                                             | Open-end                                     | Total mg<br>_____ mg                   |
| 5-FU<br>civ<br>SHOW IF E25=E]             | Dose: _____<br><input type="checkbox"/> mg / m2<br>Other unit, please tick:<br><input type="checkbox"/> mg / kg      | <input type="checkbox"/> 22h infusion every 2 weeks<br><input type="checkbox"/> 46h infusion every 2 weeks<br><input type="checkbox"/> 72h infusion every 2 weeks<br><input type="checkbox"/> 24h infusion week 1-4 every 6 weeks<br><input type="checkbox"/> other (specify)                                                  | Open-end                                     | Total mg<br>_____ mg<br>[compulsory]   |
| 5-FU<br>BOLUS<br>SHOW IF E25=F]           | Dose: _____<br><input type="checkbox"/> mg / m2                                                                      | <input type="checkbox"/> d1 every 2 weeks<br><input type="checkbox"/> d1 and 2 every 2 weeks<br><input type="checkbox"/> d1-5 every 4 weeks                                                                                                                                                                                    | Open-end                                     | Total mg<br>_____ mg<br>[compulsory]   |

|                                      |                                                                                                                |                                                                                                                                                                                                                                                                                                                       |          |                      |
|--------------------------------------|----------------------------------------------------------------------------------------------------------------|-----------------------------------------------------------------------------------------------------------------------------------------------------------------------------------------------------------------------------------------------------------------------------------------------------------------------|----------|----------------------|
|                                      |                                                                                                                | <input type="checkbox"/> once weekly week 1-4 every 6 weeks<br><input type="checkbox"/> once weekly week 1-6 every 8 weeks<br><input type="checkbox"/> other (specify)                                                                                                                                                |          |                      |
| <b>Leucovorin</b><br>SHOW IF E25=E   | Dose: _____<br><input type="checkbox"/> mg / m2                                                                | <input type="checkbox"/> d1 every 2 weeks<br><input type="checkbox"/> d1 and 2 every 2 weeks<br><input type="checkbox"/> d1-5 every 4 weeks<br><input type="checkbox"/> once weekly week 1-4 every 6 weeks<br><input type="checkbox"/> once weekly week 1-6 every 8 weeks<br><input type="checkbox"/> other (specify) | Open-end | Total mg<br>_____ mg |
| <b>Irinotecan</b><br>SHOW IF E25=F   | Dose: _____<br><input type="checkbox"/> mg / m2<br><br>Other unit, please tick:<br><input type="checkbox"/> mg | <input type="checkbox"/> d1 every 2 weeks<br><input type="checkbox"/> d1 every 3 weeks<br><input type="checkbox"/> d1 and 3 every 2 weeks<br><input type="checkbox"/> once weekly week 1-4 every 6 weeks<br><input type="checkbox"/> d1 and 15 every 4 weeks<br><input type="checkbox"/> other (specify)              | Open-end | Total mg<br>_____ mg |
| <b>Cisplatin</b><br>SHOW IF E25=G]   | Dose: _____<br><input type="checkbox"/> mg / m2                                                                | <input type="checkbox"/> d1 and 15 every 4 weeks<br><input type="checkbox"/> once every 3 weeks<br><input type="checkbox"/> once every 4 weeks<br><input type="checkbox"/> other (specify)                                                                                                                            | Open-end | Total mg<br>_____ mg |
| <b>Oxaliplatin</b><br>SHOW IF E25=H] | Dose: _____<br><input type="checkbox"/> mg / m2                                                                | <input type="checkbox"/> d1 every 2 weeks<br><input type="checkbox"/> d1 and 2 every 2 weeks<br><input type="checkbox"/> d1 every 3 weeks<br><input type="checkbox"/> once weekly week 1, 3 and 5, every 8 weeks<br><input type="checkbox"/> other (specify)                                                          | Open-end | Total mg<br>_____ mg |
| <b>S-1</b><br>SHOW IF E25=I]         | Dose: _____<br><input type="checkbox"/> mg / m2                                                                | <input type="checkbox"/> twice daily d1-28 every 6 weeks<br><input type="checkbox"/> other (specify)                                                                                                                                                                                                                  | Open-end | Total mg<br>_____ mg |
| <b>Erlotinib</b>                     | Dose: _____                                                                                                    | <input type="checkbox"/> Daily<br><input type="checkbox"/> other (specify)                                                                                                                                                                                                                                            | Open-end | Total mg             |

|                                                         |                                                                                                                                                                 |                                              |          |                             |
|---------------------------------------------------------|-----------------------------------------------------------------------------------------------------------------------------------------------------------------|----------------------------------------------|----------|-----------------------------|
| SHOW IF<br>E25=J                                        | <input type="checkbox"/> mg                                                                                                                                     |                                              |          | _____ mg                    |
| [RECALL<br>OTHERS]<br>SHOW IF<br>E25=K, L, M,<br>N, O ] | <b>Dose:</b><br>_____<br><b>Dosing unit:</b><br><input type="checkbox"/> mg / m <sup>2</sup><br><input type="checkbox"/> mg<br><input type="checkbox"/> mg / Kg | <b>Frequency, please specify</b><br>Open-end | Open-end | <b>Total mg</b><br>_____ mg |

[SHOW IF E20=1]

E27. How many cycles of the neoadjuvant therapy/ies listed above did the patient receive?

|  |  |
|--|--|
|  |  |
|--|--|

[MIN 1 - MAX 10]

[SHOW IF E20=1]

E28. Was the initial regimen modified (doses, delays, compound stopped)?

| TICK ONLY ONE                                                      |  |
|--------------------------------------------------------------------|--|
| YES, it was modified                                               |  |
| NO, it was maintained all through the entire neoadjuvant treatment |  |

[SHOW IF E28=1]

**E29. DOSING / TREATMENT CHANGES**

Doctor, you mentioned that there were modifications/delays in the therapy, please indicate what product and in which cycle there were changes:

SHOW AS MANY COLUMNS AS E27

Tick all that apply – At least one tick

| SHOW PRODUCTS SELECTED (E24 /) E25 | Cycle 1 | Cycle 2 | Cycle 3 | Cycle 4 | Etc. |  |  |
|------------------------------------|---------|---------|---------|---------|------|--|--|
| Product 1                          | AA      | BA      | CA      | DA      |      |  |  |
| Product 2                          | AB      | BB      | CB      | DB      |      |  |  |
| Product 3                          | AC      | BC      | CC      | DC      |      |  |  |
| Product 4                          | AD      | BD      | CD      | DD      |      |  |  |
| Etc.                               |         |         |         |         |      |  |  |



[SHOW IF E28=1] [NEXT SCREEN]

E30. Doctor, you mentioned that there were modifications in the therapy please indicate for each product and cycle the modifications.

| RECALL E29                             | Tick all that apply        | Specify                                                 | Total absolute dose for this cycle                                         |
|----------------------------------------|----------------------------|---------------------------------------------------------|----------------------------------------------------------------------------|
| Eg. IF AA TICKED<br>Product 1, cycle 1 | Dose delayed ○ <b>A</b>    | By how many days the dose was delayed _____             |                                                                            |
|                                        | Dose modified ○ <b>B</b>   | <b>RECALL PREVIOUS DOSE</b><br>Enter the new dose _____ | _____ Total mg<br>Tick box if other dosing unit:<br><b>INSERT OPEN END</b> |
|                                        | Product stopped ○ <b>C</b> |                                                         |                                                                            |
| <b>Etc.</b>                            |                            |                                                         |                                                                            |
|                                        |                            |                                                         |                                                                            |
|                                        |                            |                                                         |                                                                            |
|                                        |                            |                                                         |                                                                            |

Patient Record

[SHOW IF E30=C TICKED] - FOR EACH PRODUCT SELECTED

**E31. Why was one or more compounds stopped?**

|                                                                                                                | <i>Tick all that apply</i> |
|----------------------------------------------------------------------------------------------------------------|----------------------------|
| Dose-limiting toxicity / Side effects                                                                          | <b>A</b>                   |
| Prevention of future toxicity / Side effects (not yet dose-limiting before) per physician's guidance           | <b>B</b>                   |
| Prevention of future toxicity / Side effects (not yet dose-limiting before) per patient's or family's decision | <b>C</b>                   |
| Maximum cumulative dose reached                                                                                | <b>D</b>                   |
| Logistical reasons (hospital planning related)                                                                 | <b>E</b>                   |
| Logistical reasons (patient's or family's request)                                                             | <b>F</b>                   |
| Lack of efficacy / No anti-tumour value of continued treatment per physician's guidance                        | <b>G</b>                   |
| No overall value of continued treatment (overall risk-benefit) per physician's guidance                        | <b>H</b>                   |
| No overall value of continued treatment (overall risk-benefit) per patient's/family's decision                 | <b>I</b>                   |
| Other                                                                                                          | <b>J</b>                   |

**IF E25K, E25L E25M, E25N OR E25 O = nal-IRI or Onivid or MM-398  
AND E31=A OR G THEN Display Adverse Event Forms**

**[SHOW IF E30=A TICKED] FOR EACH PRODUCT SELECTED****E32. Why was dose delayed?**

|                                                                                                                | <i>Tick all that apply</i> |
|----------------------------------------------------------------------------------------------------------------|----------------------------|
| Dose-limiting toxicity / Side effects                                                                          | <b>A</b>                   |
| Prevention of future toxicity / Side effects (not yet dose-limiting before) per physician's guidance           | <b>B</b>                   |
| Prevention of future toxicity / Side effects (not yet dose-limiting before) per patient's or family's decision | <b>C</b>                   |
| Logistical reasons (hospital planning related)                                                                 | <b>D</b>                   |
| Logistical reasons (patient's or family's request)                                                             | <b>E</b>                   |
| Other                                                                                                          | <b>F</b>                   |

**IF E25K, E25L E25M, E25N OR E25 O = nal-IRI or Onivid or MM-398  
AND E32=A THEN Display Adverse Event Forms**

**[SHOW IF E30=B TICKED] FOR EACH PRODUCT SELECTED****E33. Why were doses modified?**

|                                                                                                                | <i>Tick all that apply</i> |
|----------------------------------------------------------------------------------------------------------------|----------------------------|
| Dose-limiting toxicity / Side effects                                                                          | <b>A</b>                   |
| Prevention of future toxicity / Side effects (not yet dose-limiting before) per physician's guidance           | <b>B</b>                   |
| Prevention of future toxicity / Side effects (not yet dose-limiting before) per patient's or family's decision | <b>C</b>                   |
| No overall value of continued full treatment (overall risk-benefit) per physician's guidance                   | <b>D</b>                   |
| No overall value of continued full treatment (overall risk-benefit) per patient's/family's decision            | <b>E</b>                   |
| Other                                                                                                          | <b>F</b>                   |

**IF E25K, E25L E25M, E25N OR E25 O = nal-IRI or Onivid or MM-398  
AND E33=A THEN Display Adverse Event Forms**

[SHOW IF E20=1]

E34. Was this neoadjuvant treatment given in the context of a Clinical Trial?

|     | Tick only one           |
|-----|-------------------------|
| Yes | <input type="radio"/> 1 |
| No  | <input type="radio"/> 2 |

[SHOW IF E20=1]

E35. What was the outcome of this treatment?

|                                                   | Tick only one           |
|---------------------------------------------------|-------------------------|
| Tumour down-sized and resectable                  | <input type="radio"/> 1 |
| Tumour down-sized and still borderline resectable | <input type="radio"/> 2 |
| Primary tumour progression                        | <input type="radio"/> 4 |
| Metastatic disease                                | <input type="radio"/> 5 |

[SHOW IF E20=1]

E36. Why was the neoadjuvant treatment stopped?

|                                                                                     | Tick all that apply |
|-------------------------------------------------------------------------------------|---------------------|
| Toxicity / Side effects                                                             | <b>A</b>            |
| Prevention of future toxicity / side-effects                                        | <b>B</b>            |
| Maximum cumulative dose reached                                                     | <b>C</b>            |
| Progressive disease (radiologically established)                                    | <b>D</b>            |
| Progressive disease (clinical progression)                                          | <b>E</b>            |
| Clinical deterioration necessitating stopping further treatment                     | <b>F</b>            |
| Absent overall risk-benefit of continued treatment (patient's or family's decision) | <b>G</b>            |
| Absent overall risk-benefit of continued treatment (physician's decision)           | <b>H</b>            |
| Treatment completed as per planning (received all planned cycles of the treatment)  | <b>I</b>            |
| Other                                                                               | <b>J</b>            |

IF E25K, E25L E25M, E25N OR E25 O = naI-IRI or Onivid or MM-398  
AND E36=A OR D OR E THEN Display Adverse Event Forms

[SHOW IF E21=1] [SECTION 3 UP TO PAGE 35](#)

## ADJUVANT TREATMENT

E37. Start date of treatment (DD/MM/YYYY)

|  |  |  |  |  |  |  |  |  |  |
|--|--|--|--|--|--|--|--|--|--|
|  |  |  |  |  |  |  |  |  |  |
|--|--|--|--|--|--|--|--|--|--|

[Min E19\_3; Max E6]

E38. End date of the treatment (DD/MM/YYYY)

|  |  |  |  |  |  |  |  |  |  |
|--|--|--|--|--|--|--|--|--|--|
|  |  |  |  |  |  |  |  |  |  |
|--|--|--|--|--|--|--|--|--|--|

[Min>=E37; Max E6]

E39. Was this adjuvant treatment given in the context of a Clinical Trial?

|     | Tick only one           |
|-----|-------------------------|
| Yes | <input type="radio"/> 1 |
| No  | <input type="radio"/> 2 |

E40. What adjuvant treatment did the patient receive? Please select if one of the regimen below was used

[INSERT SAME TABLE E24](#)

*Tick only one*

Patient Record

**[SHOW IF E40=21]****E41. Please select what chemotherapeutic treatment the patient received as adjuvant therapy.**

Select as many agents as it applies. If you only select one compound, we understand that you used it in monotherapy.

|                       |  |
|-----------------------|--|
| INSERT SAME TABLE E25 |  |
|-----------------------|--|

**Confirmation of regimen (selected in E24)****[SHOW IF E40=1 to 10]**

|              |                                                       |                                                   |
|--------------|-------------------------------------------------------|---------------------------------------------------|
| <b>E41_0</b> | Please confirm the regimen<br>INSERT SAME TABLE E24_1 | <b>Absolute dose given<br/>in the first cycle</b> |
|--------------|-------------------------------------------------------|---------------------------------------------------|

Patient Record

[SHOW IF E21=1]

FOR PROGRAMMING PURPOSES, EACH REGIMEN IN E40 IS SPLIT INTO E41 VARIABLES.

## E42. INITIAL DOSE AND FREQUENCY REGIMEN

| Same table as E26 (change variables) | [[Only one unit per dose]                                                                                                                              | Frequency                                                  | Other Frequency (not listed) Specify | Absolute dose given in the first cycle |
|--------------------------------------|--------------------------------------------------------------------------------------------------------------------------------------------------------|------------------------------------------------------------|--------------------------------------|----------------------------------------|
| Paclitaxel <b>SHOW IF E41=A]</b>     | Dose: _____<br><input type="checkbox"/> mg / m2<br>If other unit used, please tick:<br><input type="checkbox"/> mg<br><input type="checkbox"/> mg / Kg | Frequency:<br>[Show dropdown: once weekly / every 3 weeks] | Open-end                             | Total mg<br>_____ mg                   |
| Etc.                                 |                                                                                                                                                        |                                                            |                                      |                                        |
| Etc.                                 |                                                                                                                                                        |                                                            |                                      |                                        |

[SHOW IF E21=1]

E43. How many cycles did the patient receive?

 

[MIN 1 -MAX 10]

E44. Was the initial regimen modified (doses, delays, compound stopped)?

|                                                                 | Tick only one |
|-----------------------------------------------------------------|---------------|
| Yes, it was modified                                            | 1             |
| No, it was maintained all through the entire adjuvant treatment | 2             |

Patient Record

[SHOW IF E44=1 ]

**E45. DOSING / TREATMENT CHANGES**

Doctor, you mentioned that there were modifications in the therapy please indicate what product and in which cycle there were changes:

SHOW AS MANY COLUMNS AS E43

*Tick all that apply– At least one tick*

| SHOW<br>PRODUCTS<br>SELECTED<br>(E40 /) E41 | Cycle 1 | Cycle 2 | Cycle 2 | Cycle 3 | Etc. |  |  |
|---------------------------------------------|---------|---------|---------|---------|------|--|--|
| Product 1                                   | AA      | BA      | CA      | DA      |      |  |  |
| Product 2                                   | AB      | BB      | CB      | DB      |      |  |  |
| Product 3                                   | AC      | BC      | CC      | DC      |      |  |  |
| Product 4                                   | AD      | BD      | CD      | DD      |      |  |  |
| Etc.                                        |         |         |         |         |      |  |  |



Patient Record

**[NEXT SCREEN]**

E46. Doctor, you mentioned that there were modifications in the therapy please indicate for each product and cycle the modifications.

| <b>RECALL E45</b>                              | <b>Tick all that apply</b>                     | <b>Specify</b>                                          | <b>Total absolute dose for this cycle</b>                                  |
|------------------------------------------------|------------------------------------------------|---------------------------------------------------------|----------------------------------------------------------------------------|
| <b>Eg. IF AA TICKED<br/>Product 1, cycle 1</b> | Dose delayed <input type="radio"/> <b>A</b>    | By how many days the dose was delayed _____             |                                                                            |
|                                                | Dose modified <input type="radio"/> <b>B</b>   | <b>RECALL PREVIOUS DOSE</b><br>Enter the new dose _____ | _____ Total mg<br>Tick box if other dosing unit:<br><b>INSERT OPEN END</b> |
|                                                | Product stopped <input type="radio"/> <b>C</b> |                                                         |                                                                            |
| <b>Etc.</b>                                    |                                                |                                                         |                                                                            |
|                                                |                                                |                                                         |                                                                            |

**[SHOW IF E46=C] FOR EACH PRODUCT SELECTED****E47. Why was one or more compounds stopped?**

|                                                                                                                | <i>Tick all that apply</i> |
|----------------------------------------------------------------------------------------------------------------|----------------------------|
| Dose-limiting toxicity / Side effects                                                                          | <b>A</b>                   |
| Prevention of future toxicity / Side effects (not yet dose-limiting before) per physician's guidance           | <b>B</b>                   |
| Prevention of future toxicity / Side effects (not yet dose-limiting before) per patient's or family's decision | <b>C</b>                   |
| Maximum cumulative dose reached                                                                                | <b>D</b>                   |
| Logistical reasons (hospital planning related)                                                                 | <b>E</b>                   |
| Logistical reasons (patient's or family's request)                                                             | <b>F</b>                   |
| No anti-tumour value of continued treatment per physician's guidance                                           | <b>G</b>                   |
| No overall value of continued treatment (overall risk-benefit) per physician's guidance                        | <b>I</b>                   |
| No overall value of continued treatment (overall risk-benefit) per patient's/family's decision                 | <b>J</b>                   |
| Other                                                                                                          | <b>K</b>                   |

**IF E41K, E41L E41M, E41N OR E41 O = naI-IRI or Onivid or MM-398  
AND E47=A THEN Display Adverse Event Forms**

**[SHOW IF E46=A] FOR EACH PRODUCT SELECTED****E48. Why was dose delayed?**

|                                                                                                                | <i>Tick all that apply</i> |
|----------------------------------------------------------------------------------------------------------------|----------------------------|
| Dose-limiting toxicity / Side effects                                                                          | <b>A</b>                   |
| Prevention of future toxicity / Side effects (not yet dose-limiting before) per physician's guidance           | <b>B</b>                   |
| Prevention of future toxicity / Side effects (not yet dose-limiting before) per patient's or family's decision | <b>C</b>                   |
| Logistical reasons (hospital planning related)                                                                 | <b>E</b>                   |
| Logistical reasons (patient's or family's request)                                                             | <b>F</b>                   |
| Other                                                                                                          | <b>K</b>                   |

**IF E41K, E41L E41M, E41N OR E41 O = nal-IRI or Onivid or MM-398 AND E48=A, THEN Display Adverse Event Forms**

**[SHOW IF E46=B FOR EACH PRODUCT SELECTED****E49. Why were doses modified?**

|                                                                                                                | <i>Tick all that apply</i> |
|----------------------------------------------------------------------------------------------------------------|----------------------------|
| Dose-limiting toxicity / Side effects                                                                          | <b>A</b>                   |
| Prevention of future toxicity / Side effects (not yet dose-limiting before) per physician's guidance           | <b>B</b>                   |
| Prevention of future toxicity / Side effects (not yet dose-limiting before) per patient's or family's decision | <b>C</b>                   |
| No overall value of continued full treatment (overall risk-benefit) per physician's guidance                   | <b>I</b>                   |
| No overall value of continued full treatment (overall risk-benefit) per patient's/family's decision            | <b>J</b>                   |
| Other                                                                                                          | <b>K</b>                   |

**IF E41K, E41L E41M, E41N OR E41 O = nal-IRI or Onivid or MM-398 AND E49=A, THEN Display Adverse Event Forms**

[SHOW IF E21=1]

E50. What was the outcome of this treatment?

|                                                | Tick only one           |
|------------------------------------------------|-------------------------|
| Local recurrence                               | <input type="radio"/> 1 |
| Metastatic disease                             | <input type="radio"/> 2 |
| No sign of local recurrence/metastatic disease | <input type="radio"/> 3 |

E51. Why was the adjuvant treatment stopped?

|                                                                                     | Tick all that apply        |
|-------------------------------------------------------------------------------------|----------------------------|
| Toxicity / Side effects                                                             | <input type="checkbox"/> A |
| Prevention of future toxicity / side-effects                                        | <input type="checkbox"/> B |
| Maximum cumulative dose reached                                                     | <input type="checkbox"/> C |
| Progressive disease (radiologically established)                                    | <input type="checkbox"/> D |
| Progressive disease (clinical progression)                                          | <input type="checkbox"/> E |
| Clinical deterioration necessitating stopping further treatment                     | <input type="checkbox"/> F |
| Absent overall risk-benefit of continued treatment (patient's or family's decision) | <input type="checkbox"/> G |
| Absent overall risk-benefit of continued treatment (physician's decision)           | <input type="checkbox"/> H |
| Treatment completed as per planning (received all planned cycles of the treatment)  | <input type="checkbox"/> I |
| Other                                                                               | <input type="checkbox"/> J |

IF E41K, E41L E41M, E41N OR E41 O = nal-IRI or Onivid or MM-398  
AND E48=A, DE, E THEN Display Adverse Event Forms

[SHOW IF E18=3] [SECTION 4 UP TO PAGE 42](#)

## TREATMENT FOR LOCALLY ADVANCED UNRESECTABLE (AT THE TIME OF DIAGNOSIS) DISEASE

[SHOW IF E18=3]

E52. Start date of treatment (DD/MM/YYYY)

|  |  |  |  |  |  |  |  |  |  |
|--|--|--|--|--|--|--|--|--|--|
|  |  |  |  |  |  |  |  |  |  |
|--|--|--|--|--|--|--|--|--|--|

[Min E5 ; Max E6]

[SHOW IF E18=3]

E53. End date of the treatment (DD/MM/YYYY)

|  |  |  |  |  |  |  |  |  |  |
|--|--|--|--|--|--|--|--|--|--|
|  |  |  |  |  |  |  |  |  |  |
|--|--|--|--|--|--|--|--|--|--|

[Min >E52; Max E6]

[SHOW IF E18=3]

E54. Was this treatment given in the context of a Clinical Trial?

|     | Tick only one           |
|-----|-------------------------|
| Yes | <input type="radio"/> 1 |
| No  | <input type="radio"/> 2 |

[SHOW IF E18=3]

E55. What chemotherapeutic treatment did the patient receive? Please select if one of the regimen below was used

|                       |  |
|-----------------------|--|
|                       |  |
| INSERT SAME TABLE E24 |  |

Patient Record

[SHOW IF E55=21]

**E56. Please select what chemotherapeutic treatment the patient received.**

Select as many agents as it applies. If you only select one compound, we understand that you used it in monotherapy.

|                          |                            |
|--------------------------|----------------------------|
| <b>SAME TABLE AS E25</b> | <i>Tick all that apply</i> |
|                          | <b>A</b>                   |

[SHOW IF E55=1 to 10]

**Confirmation of regimen (selected in E55)**

|              |                                                                            |                                                                    |
|--------------|----------------------------------------------------------------------------|--------------------------------------------------------------------|
| <b>E55_0</b> | <p>Please confirm the regimen</p> <p><b>INSERT SAME TABLE AS E24_0</b></p> | <p><b>Absolute dose given</b></p> <p><b>in the first cycle</b></p> |
|--------------|----------------------------------------------------------------------------|--------------------------------------------------------------------|

[SHOW IF E18=3]

FOR PROGRAMMING PURPOSES, EACH REGIMEN IN E55 IS SPLIT INTO E56 VARIABLES.

E57. INITIAL DOSE AND FREQUENCY REGIMEN

| Same table as E26 (change variables) | [[Only one unit per dose]                                                                                                                              | Frequency                                                  | Other Frequency (not listed) Specify | Absolute dose given in the first cycle |
|--------------------------------------|--------------------------------------------------------------------------------------------------------------------------------------------------------|------------------------------------------------------------|--------------------------------------|----------------------------------------|
| Paclitaxel <b>SHOW IF E56=A]</b>     | Dose: _____<br><input type="checkbox"/> mg / m2<br>If other unit used, please tick:<br><input type="checkbox"/> mg<br><input type="checkbox"/> mg / Kg | Frequency:<br>[Show dropdown: once weekly / every 3 weeks] | Open-end                             | Total mg<br>_____ mg                   |
| Etc.                                 |                                                                                                                                                        |                                                            |                                      |                                        |
| Etc.                                 |                                                                                                                                                        |                                                            |                                      |                                        |

[SHOW IF E18=3]

E58. How many cycles did the patient receive?

|  |  |
|--|--|
|  |  |
|--|--|

[MIN 1 -MAX 10]

[SHOW IF E18=3]

E59. Was the initial regimen modified (doses, delays, compound stopped)?

|                                              | Tick only one |
|----------------------------------------------|---------------|
| Yes, it was modified                         | 1             |
| No, it was maintained all through the cycles | 2             |

Patient Record

[SHOW IF E59=1 ]

**E60. DOSING CHANGES**

Doctor, you mentioned that there were modifications in the therapy please indicate what product and in which cycle there were changes:

SHOW AS MANY COLUMNS AS E58

Tick all that apply– At least one tick

| SHOW<br>PRODUCTS<br>SELECTED<br>(E55/) E_56 | Cycle 1 | Cycle 2 | Cycle 2 | Cycle 3 | Etc. |  |  |
|---------------------------------------------|---------|---------|---------|---------|------|--|--|
| Product 1                                   | AA      | BA      | CA      | DA      |      |  |  |
| Product 2                                   | AB      | BB      | CB      | DB      |      |  |  |
| Product 3                                   | AC      | BC      | CC      | DC      |      |  |  |
| Product 4                                   | AD      | BD      | CD      | DD      |      |  |  |
| Etc.                                        |         |         |         |         |      |  |  |

Patient Record

**[SHOW IF E59=1 ]**

E61. Doctor, you mentioned that there were modifications in the therapy please indicate for each product and cycle the modifications.

| <b>RECALL E60</b>                              | <b>Tick all that apply</b>                     | <b>Specify</b>                                          | <b>Total absolute dose for this cycle</b>                                        |
|------------------------------------------------|------------------------------------------------|---------------------------------------------------------|----------------------------------------------------------------------------------|
| <b>Eg. IF AA TICKED<br/>Product 1, cycle 1</b> | Dose delayed <input type="radio"/> <b>A</b>    | By how many days the dose was delayed _____             |                                                                                  |
|                                                | Dose modified <input type="radio"/> <b>B</b>   | <b>RECALL PREVIOUS DOSE</b><br>Enter the new dose _____ | _____ Total mg<br>Tick box if other dosing unit:<br>_____ <b>INSERT OPEN END</b> |
|                                                | Product stopped <input type="radio"/> <b>C</b> |                                                         |                                                                                  |
| <b>Etc.</b>                                    |                                                |                                                         |                                                                                  |
|                                                |                                                |                                                         |                                                                                  |

**[SHOW IF E61=C] FOR EACH PRODUCT SELECTED****E62. Why was one or more compounds stopped?**

|                                                                                                                | <i>Tick all that apply</i> |
|----------------------------------------------------------------------------------------------------------------|----------------------------|
| Dose-limiting toxicity / Side effects                                                                          | <b>A</b>                   |
| Prevention of future toxicity / Side effects (not yet dose-limiting before) per physician's guidance           | <b>B</b>                   |
| Prevention of future toxicity / Side effects (not yet dose-limiting before) per patient's or family's decision | <b>C</b>                   |
| Maximum cumulative dose reached                                                                                | <b>D</b>                   |
| Logistical reasons (hospital planning related)                                                                 | <b>E</b>                   |
| Logistical reasons (patient's or family's request)                                                             | <b>F</b>                   |
| No anti-tumour value of continued treatment per physician's guidance                                           | <b>G</b>                   |
| No overall value of continued treatment (overall risk-benefit) per physician's guidance                        | <b>H</b>                   |
| No overall value of continued treatment (overall risk-benefit) per patient's/family's decision                 | <b>I</b>                   |
| Other                                                                                                          | <b>J</b>                   |

**IF E56K, E56L E56M, E56N OR E56 O = nal-IRI or Onivid or MM-398  
AND E62=A THEN Display Adverse Event Forms**



**[SHOW IF E61=A] FOR EACH PRODUCT SELECTED****E63. Why was dose delayed?**

|                                                                                                                | <i>Tick all that apply</i> |
|----------------------------------------------------------------------------------------------------------------|----------------------------|
| Dose-limiting toxicity / Side effects                                                                          | <b>A</b>                   |
| Prevention of future toxicity / Side effects (not yet dose-limiting before) per physician's guidance           | <b>B</b>                   |
| Prevention of future toxicity / Side effects (not yet dose-limiting before) per patient's or family's decision | <b>C</b>                   |
| Logistical reasons (hospital planning related)                                                                 | <b>D</b>                   |
| Logistical reasons (patient's or family's request)                                                             | <b>E</b>                   |
| Other                                                                                                          | <b>F</b>                   |

**IF E56K, E56L E56M, E56N OR E56 O = nal-IRI or Onivid or MM-398  
AND E63=A THEN Display Adverse Event Forms**

**[SHOW IF E61=B] FOR EACH PRODUCT SELECTED****E64. Why were doses modified?**

|                                                                                                                | <i>Tick all that apply</i> |
|----------------------------------------------------------------------------------------------------------------|----------------------------|
| Dose-limiting toxicity / Side effects                                                                          | <b>A</b>                   |
| Prevention of future toxicity / Side effects (not yet dose-limiting before) per physician's guidance           | <b>B</b>                   |
| Prevention of future toxicity / Side effects (not yet dose-limiting before) per patient's or family's decision | <b>C</b>                   |
| No overall value of continued full treatment (overall risk-benefit) per physician's guidance                   | <b>D</b>                   |
| No overall value of continued full treatment (overall risk-benefit) per patient's/family's decision            | <b>E</b>                   |
| Other                                                                                                          | <b>F</b>                   |

**IF E56K, E56L E56M, E56N OR E56 O = nal-IRI or Onivid or MM-398  
AND E64=A, THEN Display Adverse Event Forms**

[SHOW if E18=3]

E65. What was the best response of this treatment?

|                     | Tick only one           |
|---------------------|-------------------------|
| Complete response   | <input type="radio"/> 1 |
| Partial Response    | <input type="radio"/> 2 |
| Stable disease      | <input type="radio"/> 3 |
| Progressive disease | <input type="radio"/> 4 |

[SHOW if E18=3]

E66. Why was the treatment for locally advanced unresectable tumour stopped?

|                                                                                     | Tick all that apply        |
|-------------------------------------------------------------------------------------|----------------------------|
| Toxicity / Side effects                                                             | <input type="checkbox"/> A |
| Prevention of future toxicity / side-effects                                        | <input type="checkbox"/> B |
| Maximum cumulative dose reached                                                     | <input type="checkbox"/> C |
| Progressive disease (radiologically established)                                    | <input type="checkbox"/> D |
| Progressive disease (clinical progression)                                          | <input type="checkbox"/> E |
| Clinical deterioration necessitating stopping further treatment                     | <input type="checkbox"/> F |
| Absent overall risk-benefit of continued treatment (patient's or family's decision) | <input type="checkbox"/> G |
| Absent overall risk-benefit of continued treatment (physician's decision)           | <input type="checkbox"/> H |
| Treatment completed as per planning (received all planned cycles of the treatment)  | <input type="checkbox"/> I |
| Other                                                                               | <input type="checkbox"/> J |

IF E56K, E56L E56M, E56N OR E56 O = nal-IRI or Onivid or MM-398  
AND E66=A, D, E THEN Display Adverse Event Forms

[\[SHOW ALL\] SECTION 5 UP TO PAGE 45](#)

### **Metastatic setting**

#### **E67. Location of metastases at first diagnosis of metastatic disease**

|   |                 | <i>Tick all that apply</i>                      |
|---|-----------------|-------------------------------------------------|
| A | Peritoneum      | <input type="checkbox"/> <a href="#">[E67A]</a> |
| B | Liver           | <input type="checkbox"/> <a href="#">[E67B]</a> |
| C | Lung and pleura | <input type="checkbox"/> <a href="#">[E67C]</a> |
| D | Bone            | <input type="checkbox"/> <a href="#">[E67D]</a> |
| E | Brain           | <input type="checkbox"/> <a href="#">[E67E]</a> |
| F | Adrenal glands  | <input type="checkbox"/> <a href="#">[E67F]</a> |
| G | Other           | <input type="checkbox"/> <a href="#">[E67G]</a> |

[\[SHOW IF E16= 1 TO 6 OR E16=8\]](#)

#### **E68. Performance status at diagnosis of metastatic disease**

| <b>ECOG Grade</b> | <b>Karnofsky Grade</b> | <b>Tick only one</b>                    |
|-------------------|------------------------|-----------------------------------------|
| 0                 | 100                    | <input type="radio"/> <a href="#">1</a> |
| 1                 | 80-90                  | <input type="radio"/> <a href="#">2</a> |
| 2                 | 60-70                  | <input type="radio"/> <a href="#">3</a> |
| 3                 | 40-50                  | <input type="radio"/> <a href="#">4</a> |
| 4                 | 10-30                  | <input type="radio"/> <a href="#">5</a> |
| Unknown           |                        | <input type="radio"/> <a href="#">6</a> |

For details on the ECOG and Karnofsky Grade, please click here. [\[INSERT LINK – APPENDIX 1\]](#)

[SHOW IF E16= 1 TO 6 OR E16=8]

E69. Please indicate level at first diagnosis of metastatic disease

|   |           |        |                              | To be programmed |             |
|---|-----------|--------|------------------------------|------------------|-------------|
|   |           |        |                              | MIN              | MAX         |
|   |           |        | <i>Tick if not performed</i> |                  |             |
| 1 | CA19-9    | U/ml   |                              | 0                | 5000        |
| 2 | Albumin   | g/l    |                              | 15 g/l           | 80 g/l      |
| 3 | Bilirubin | IU/L   |                              | 0.1 IU/l         | 30,000 IU/L |
|   |           | µmol/l |                              | 5 µmol /l        | 700 µmol/l  |

[IF OUTSIDE RANGES ASK] Can you please confirm this value?

YES / NO [IF YES GO TO NEXT QUESTION, IF NO GO BACK TO E69]

[SHOW ALL]

E70. Comorbidities at moment of diagnosis of metastatic disease

|   |                                  | <i>Tick all that apply</i>      |
|---|----------------------------------|---------------------------------|
| A | Obesity                          | <input type="checkbox"/> [E70A] |
| B | Hypertension                     | <input type="checkbox"/> [E70B] |
| C | Diabetes mellitus                | <input type="checkbox"/> [E70C] |
| D | Former smoker                    | <input type="checkbox"/> [E70D] |
| E | Current smoker                   | <input type="checkbox"/> [E70E] |
| F | Depression                       | <input type="checkbox"/> [E70F] |
| G | Chronic Pulmonary Disease        | <input type="checkbox"/> [E70G] |
| H | History of myocardial infarction | <input type="checkbox"/> [E70H] |
| I | Hypercalcemia                    | <input type="checkbox"/> [E70I] |
|   | Other                            |                                 |
|   | None                             |                                 |

[SHOW ALL] SECTION 6 UP TO PAGE 53

## **First line metastatic treatment**

[SHOW ALL]

E71. Start date of the 1<sup>st</sup> line metastatic treatment (DD/MM/YYYY)

|  |  |  |  |  |  |  |  |  |  |
|--|--|--|--|--|--|--|--|--|--|
|  |  |  |  |  |  |  |  |  |  |
|--|--|--|--|--|--|--|--|--|--|

[Min => E6 ; Max 1/10/2015]

[SHOW ALL]

E72. End date of the 1<sup>st</sup> line metastatic treatment (DD/MM/YYYY)

|  |  |  |  |  |  |  |  |  |  |
|--|--|--|--|--|--|--|--|--|--|
|  |  |  |  |  |  |  |  |  |  |
|--|--|--|--|--|--|--|--|--|--|

[Min >E71 ; Max 1/10/2015]

[SHOW ALL]

E73. Was this treatment given in the context of a Clinical Trial?

|     | Tick only one           |
|-----|-------------------------|
| Yes | <input type="radio"/> 1 |
| No  | <input type="radio"/> 2 |

[SHOW ALL]

E74. What treatment did the patient receive in 1<sup>st</sup> Line? Please select if one of the regimen below was used

|                       |               |
|-----------------------|---------------|
| INSERT SAME TABLE E24 | Tick only one |
|-----------------------|---------------|

Patient Record

[SHOW IF E74=21]

E75. Please select what chemotherapeutic treatment the patient received in 1<sup>ST</sup> line.

Select as many agents as it applies. If you only select one compound, we understand that you used it in monotherapy.

|                       |  |
|-----------------------|--|
| INSERT SAME TABLE E25 |  |
|-----------------------|--|

[SHOW IF E74=1 to 10]

Confirmation of regimen (selected in E74)

|       |                                                       |                                           |
|-------|-------------------------------------------------------|-------------------------------------------|
| E74_0 | Please confirm the regimen<br>INSERT SAME TABLE E24_1 | Absolute dose given<br>in the first cycle |
|-------|-------------------------------------------------------|-------------------------------------------|

Patient Record

[\[SHOW ALL\]](#)

FOR PROGRAMMING PURPOSES, EACH REGIMEN IN E74 IS SPLIT INTO E75 VARIABLES.

## E76. INITIAL DOSE AND FREQUENCY REGIMEN

| Same table as E26 (change variables)      | [[Only one unit per dose]                                                                                                                              | Frequency                                                                  | Other Frequency (not listed) Specify | Absolute dose given in the first cycle |
|-------------------------------------------|--------------------------------------------------------------------------------------------------------------------------------------------------------|----------------------------------------------------------------------------|--------------------------------------|----------------------------------------|
| Paclitaxel <a href="#">SHOW IF E75=A]</a> | Dose: _____<br><input type="checkbox"/> mg / m2<br>If other unit used, please tick:<br><input type="checkbox"/> mg<br><input type="checkbox"/> mg / Kg | Frequency:<br><a href="#">[Show dropdown: once weekly / every 3 weeks]</a> | <a href="#">Open-end</a>             | Total mg<br>_____ mg                   |
| Etc.                                      |                                                                                                                                                        |                                                                            |                                      |                                        |
| Etc.                                      |                                                                                                                                                        |                                                                            |                                      |                                        |

[\[SHOW ALL\]](#)

E77. How many cycles did the patient receive?

[\[MIN 1-MAX 10\]](#)

|  |  |
|--|--|
|  |  |
|--|--|

[\[SHOW ALL\]](#)

E78. Was the initial regimen modified (doses, delays, compound stopped)?

|                                                                             | TICK ONLY ONE     |
|-----------------------------------------------------------------------------|-------------------|
| YES                                                                         | <a href="#">1</a> |
| NO, it was maintained all through the entire 1 <sup>st</sup> line treatment | <a href="#">2</a> |

Patient Record

[SHOW IF E78=1]

**E79. DOSING CHANGES**

Doctor, you mentioned that there were modifications in the therapy please indicate what product and in which cycle there were changes:

**SHOW AS MANY COLUMNS AS E77**

*Tick all that apply– At least one tick*

| SHOW PRODUCTS SELECTED (E74 / E75) | Cycle 1 | Cycle 2 | Cycle 2 | Cycle 3 | Etc. |  |  |
|------------------------------------|---------|---------|---------|---------|------|--|--|
| Product 1                          | AA      | BA      | CA      | DA      |      |  |  |
| Product 2                          | AB      | BB      | CB      | DB      |      |  |  |
| Product 3                          | AC      | BC      | CC      | DC      |      |  |  |
| Product 4                          | AD      | BD      | CD      | DD      |      |  |  |
| Etc.                               |         |         |         |         |      |  |  |

[NEXT SCREEN]

E80. Doctor, you mentioned that there were modifications in the therapy please indicate for each product and cycle the modifications.

| RECALL E79                             | Tick all that apply                            | Specify                                                 | Total absolute dose for this cycle                                               |
|----------------------------------------|------------------------------------------------|---------------------------------------------------------|----------------------------------------------------------------------------------|
| Eg. IF AA TICKED<br>Product 1, cycle 1 | Dose delayed <input type="radio"/> <b>A</b>    | By how many days the dose was delayed _____             |                                                                                  |
|                                        | Dose modified <input type="radio"/> <b>B</b>   | <b>RECALL PREVIOUS DOSE</b><br>Enter the new dose _____ | _____ Total mg<br>Tick box if other dosing unit:<br>_____ <b>INSERT OPEN END</b> |
|                                        | Product stopped <input type="radio"/> <b>C</b> |                                                         |                                                                                  |
| Etc.                                   |                                                |                                                         |                                                                                  |
|                                        |                                                |                                                         |                                                                                  |



Patient Record

**[SHOW IF E79=C] FOR EACH PRODUCT SELECTED****E81. Why was one or more compounds stopped?**

|                                                                                                                | <i>Tick all that apply</i> |
|----------------------------------------------------------------------------------------------------------------|----------------------------|
| Dose-limiting toxicity / Side effects                                                                          | <b>A</b>                   |
| Prevention of future toxicity / Side effects (not yet dose-limiting before) per physician's guidance           | <b>B</b>                   |
| Prevention of future toxicity / Side effects (not yet dose-limiting before) per patient's or family's decision | <b>C</b>                   |
| Maximum cumulative dose reached                                                                                | <b>D</b>                   |
| Logistical reasons (hospital planning related)                                                                 | <b>E</b>                   |
| Logistical reasons (patient's or family's request)                                                             | <b>F</b>                   |
| No anti-tumour value of continued treatment per physician's guidance                                           | <b>G</b>                   |
| No overall value of continued treatment (overall risk-benefit) per physician's guidance                        | <b>H</b>                   |
| No overall value of continued treatment (overall risk-benefit) per patient's/family's decision                 | <b>I</b>                   |
| Other                                                                                                          | <b>J</b>                   |

**IF E75K, E75L E75M, E75N OR E75 O = nal-IRI or Onivid or MM-398  
AND E81=A THEN Display Adverse Event Forms**

**[SHOW IF E79=A] FOR EACH PRODUCT SELECTED****E82. Why was dose delayed?**

|                                                                                                                | <i>Tick all that apply</i> |
|----------------------------------------------------------------------------------------------------------------|----------------------------|
| Dose-limiting toxicity / Side effects                                                                          | <b>A</b>                   |
| Prevention of future toxicity / Side effects (not yet dose-limiting before) per physician's guidance           | <b>B</b>                   |
| Prevention of future toxicity / Side effects (not yet dose-limiting before) per patient's or family's decision | <b>C</b>                   |
| Logistical reasons (hospital planning related)                                                                 | <b>D</b>                   |
| Logistical reasons (patient's or family's request)                                                             | <b>E</b>                   |
| Other                                                                                                          | <b>F</b>                   |

**IF E75K, E75L E75M, E75N OR E75 O = nal-IRI or Onivid or MM-398 AND E82=A, THEN Display Adverse Event Forms**

**[SHOW IF E79=B] FOR EACH PRODUCT SELECTED****E83. Why were doses modified?**

|                                                                                                                | <i>Tick all that apply</i> |
|----------------------------------------------------------------------------------------------------------------|----------------------------|
| Dose-limiting toxicity / Side effects                                                                          | <b>A</b>                   |
| Prevention of future toxicity / Side effects (not yet dose-limiting before) per physician's guidance           | <b>B</b>                   |
| Prevention of future toxicity / Side effects (not yet dose-limiting before) per patient's or family's decision | <b>C</b>                   |
| No overall value of continued full treatment (overall risk-benefit) per physician's guidance                   | <b>D</b>                   |
| No overall value of continued full treatment (overall risk-benefit) per patient's/family's decision            | <b>E</b>                   |
| Other                                                                                                          | <b>F</b>                   |

**IF E75K, E75L E75M, E75N OR E75 O = nal-IRI or Onivid or MM-398 AND E83=A THEN Display Adverse Event Forms**

[\[SHOW ALL\]](#)E84. What was the performance status at start of 1<sup>st</sup> line

| ECOG Grade | Karnofsky Grade | Tick only one           |
|------------|-----------------|-------------------------|
| 0          | 100             | <input type="radio"/> 1 |
| 1          | 80-90           | <input type="radio"/> 2 |
| 2          | 60-70           | <input type="radio"/> 3 |
| 3          | 40-50           | <input type="radio"/> 4 |
| 4          | 10-30           | <input type="radio"/> 5 |
| Unknown    |                 | <input type="radio"/> 6 |

For details on the ECOG and Karnofsky Grade, please click here. [\[INSERT LINK – APPENDIX 1\]](#)[\[SHOW ALL\]](#)E85. Please indicate level at start of 1<sup>st</sup> line metastatic treatment

|   |           |        |                              | To be programmed |             |
|---|-----------|--------|------------------------------|------------------|-------------|
|   |           |        |                              | MIN              | MAX         |
|   |           |        | <i>Tick if not performed</i> |                  |             |
| 1 | CA19-9    | U/ml   |                              | 0                | 5000        |
| 2 | Albumin   | g/l    |                              | 15 g/l           | 80 g/l      |
| 3 | Bilirubin | IU/L   |                              | 0.1 IU/l         | 30,000 IU/L |
|   |           | µmol/l |                              | 5 µmol /l        | 700 µmol/l  |

[\[IF OUTSIDE RANGES \]](#) Can you please confirm this value?YES / NO [\[IF YES GO TO NEXT QUESTION, IF NO GO BACK TO E85\]](#)

[\[SHOW ALL\]](#)**E86. Best radiological response to treatment**

|                     | Tick only one           |
|---------------------|-------------------------|
| Complete response   | <input type="radio"/> 1 |
| Partial response    | <input type="radio"/> 2 |
| Stable disease      | <input type="radio"/> 3 |
| Progressive disease | <input type="radio"/> 4 |

[\[SHOW ALL\]](#)**E87. Did the patient progress?**

|     | Tick only one           |
|-----|-------------------------|
| YES | <input type="radio"/> 1 |
| NO  | <input type="radio"/> 2 |

**IF E75K, E75L E75M, E75N OR E75 O = nal-IRI or Onivid or MM-398  
AND E87=1 THEN Display Adverse Event Forms**

[\[SHOW IF E87=1 \]](#)**E88. When was progression documented? (DD/MM/YYYY)**

|  |  |  |  |  |  |  |  |  |  |
|--|--|--|--|--|--|--|--|--|--|
|  |  |  |  |  |  |  |  |  |  |
|--|--|--|--|--|--|--|--|--|--|

[Min =&gt; E71 ; Max today]

[\[SHOW IF E87=1\]](#)**E89. How was progression documented?**

|                | Tick only one           |
|----------------|-------------------------|
| Radiologically | <input type="radio"/> 1 |
| Clinically     | <input type="radio"/> 2 |
| Both           | <input type="radio"/> 3 |

Patient Record

[\[SHOW ALL\]](#)**E90. Why was 1<sup>st</sup> line treatment stopped?**

|                                                                                     | <i>Tick all that apply</i> |
|-------------------------------------------------------------------------------------|----------------------------|
| Toxicity / Side effects                                                             | <b>A</b>                   |
| Prevention of future toxicity / side-effects                                        | <b>B</b>                   |
| Maximum cumulative dose reached                                                     | <b>C</b>                   |
| Progressive disease (radiologically established)                                    | <b>D</b>                   |
| Progressive disease (clinical progression)                                          | <b>E</b>                   |
| Clinical deterioration necessitating stopping further treatment                     | <b>F</b>                   |
| Absent overall risk-benefit of continued treatment (patient's or family's decision) | <b>G</b>                   |
| Absent overall risk-benefit of continued treatment (physician's decision)           | <b>H</b>                   |
| Treatment completed as per planning (received all planned cycles of the treatment)  | <b>I</b>                   |
| Other                                                                               | <b>J</b>                   |
| Death <a href="#">[HIDE IF E3=1]</a>                                                | H                          |

**IF E75K, E75L E75M, E75N OR E75 O = nal-IRI or Onivid or MM-398  
AND E90=A, D, E,H THEN Display Adverse Event Forms**

[SHOW IF E3A>=3 OR E3B>=4]  
SECTION 7 UP TO PAGE 62

## Second line metastatic treatment

E91. Start date of the 2nd line metastatic treatment (DD/MM/YYYY)          
[Min => E72 ; Max today]

[SHOW IF E3A>=4 OR E3B>=5]  
E92. End date of the 2nd line metastatic treatment (DD/MM/YYYY)          
[Min >E91 ; Max today]

[SHOW IF E3A>=3 OR E3B>=4]  
E93. Was this treatment given in the context of a Clinical Trial?

|     | Tick only one           |
|-----|-------------------------|
| Yes | <input type="radio"/> 1 |
| No  | <input type="radio"/> 2 |

[SHOW IF E3A>=3 OR E3B>=4]  
E94. What treatment did the patient receive in 2<sup>nd</sup> Line? Please select if one of the regimen below was used

|                       |               |
|-----------------------|---------------|
| INSERT SAME TABLE E24 | Tick only one |
|-----------------------|---------------|

Patient Record

[SHOW IF E94=21]

E95. Please select what chemotherapeutic treatment the patient received in 2<sup>nd</sup> line.

Select as many agents as it applies. If you only select one compound, we understand that you used it in monotherapy.

|                       |  |
|-----------------------|--|
| INSERT SAME TABLE E25 |  |
|-----------------------|--|

[SHOW IF E94=1 to 10]

Confirmation of regimen (selected in E94)

|       |                                                       |                                           |
|-------|-------------------------------------------------------|-------------------------------------------|
| E94_0 | Please confirm the regimen<br>INSERT SAME TABLE E24_1 | Absolute dose given<br>in the first cycle |
|-------|-------------------------------------------------------|-------------------------------------------|

Patient Record

[SHOW IF E3A>=3 OR E3B>=4]  
**FOR PROGRAMMING PURPOSES, EACH REGIMEN IN E94IS SPLIT INTO E95 VARIABLES.**

**E96. INITIAL DOSE AND FREQUENCY REGIMEN**

| Same table as E26 (change variables) | [[Only one unit per dose]                                                                                                                              | Frequency                                                         | Other Frequency (not listed) Specify | Absolute dose given in the first cycle |
|--------------------------------------|--------------------------------------------------------------------------------------------------------------------------------------------------------|-------------------------------------------------------------------|--------------------------------------|----------------------------------------|
| Paclitaxel <b>SHOW IF E95=A]</b>     | Dose: _____<br><input type="checkbox"/> mg / m2<br>If other unit used, please tick:<br><input type="checkbox"/> mg<br><input type="checkbox"/> mg / Kg | Frequency:<br><b>[Show dropdown: once weekly / every 3 weeks]</b> | <b>Open-end</b>                      | Total mg<br>_____ mg                   |
| Etc.                                 |                                                                                                                                                        |                                                                   |                                      |                                        |
| Etc.                                 |                                                                                                                                                        |                                                                   |                                      |                                        |

[SHOW IF E3A>=3 OR E3B>=4]  
 E97. How many cycles did the patient receive?  
 [MIN 1 -MAX 10]

|  |  |
|--|--|
|  |  |
|--|--|

[SHOW IF E3A>=3 OR E3B>=4]

E98. Was the initial regimen maintained all through the entire 2<sup>nd</sup> line or was it modified (doses, delays, compound stopped)?

|                                              | TICK ONLY ONE |
|----------------------------------------------|---------------|
| Yes, it was modified                         | 1             |
| No, it was maintained all through the cycles | 2             |



Patient Record

[SHOW IF E98=1 ]:

**E99. DOSING CHANGES**

Doctor, you mentioned that there were modifications in the therapy please indicate what product and in which cycle there were changes:

SHOW AS MANY COLUMNS AS E97

Tick all that apply– At least one tick

| SHOW PRODUCTS SELECTED (E94/ E95) | Cycle 1 | Cycle 2 | Cycle 2 | Cycle 3 | Etc. |  |  |
|-----------------------------------|---------|---------|---------|---------|------|--|--|
| Product 1                         | AA      | BA      | CA      | DA      |      |  |  |
| Product 2                         | AB      | BB      | CB      | DB      |      |  |  |
| Product 3                         | AC      | BC      | CC      | DC      |      |  |  |
| Product 4                         | AD      | BD      | CD      | DD      |      |  |  |
| Etc.                              |         |         |         |         |      |  |  |

**NEXT SCREEN]**

E100. Doctor, you mentioned that there were modifications in the therapy please indicate for each product and cycle the modifications.

| RECALL E99                             | Tick all that apply        | Specify                                                 | Total absolute dose for this cycle                                         |
|----------------------------------------|----------------------------|---------------------------------------------------------|----------------------------------------------------------------------------|
| Eg. IF AA TICKED<br>Product 1, cycle 1 | Dose delayed ○ <b>A</b>    | By how many days the dose was delayed _____             |                                                                            |
|                                        | Dose modified ○ <b>B</b>   | <b>RECALL PREVIOUS DOSE</b><br>Enter the new dose _____ | _____ Total mg<br>Tick box if other dosing unit:<br><b>INSERT OPEN END</b> |
|                                        | Product stopped ○ <b>C</b> |                                                         |                                                                            |
| Etc.                                   |                            |                                                         |                                                                            |
|                                        |                            |                                                         |                                                                            |

Patient Record

**[SHOW IF E100=C] FOR EACH PRODUCT SELECTED****E101. Why was one or more compounds stopped?**

|                                                                                                                | <i>Tick all that apply</i> |
|----------------------------------------------------------------------------------------------------------------|----------------------------|
| Dose-limiting toxicity / Side effects                                                                          | <b>A</b>                   |
| Prevention of future toxicity / Side effects (not yet dose-limiting before) per physician's guidance           | <b>B</b>                   |
| Prevention of future toxicity / Side effects (not yet dose-limiting before) per patient's or family's decision | <b>C</b>                   |
| Maximum cumulative dose reached                                                                                | <b>D</b>                   |
| Logistical reasons (hospital planning related)                                                                 | <b>E</b>                   |
| Logistical reasons (patient's or family's request)                                                             | <b>F</b>                   |
| No anti-tumour value of continued treatment per physician's guidance                                           | <b>G</b>                   |
| No overall value of continued treatment (overall risk-benefit) per physician's guidance                        | <b>H</b>                   |
| No overall value of continued treatment (overall risk-benefit) per patient's/family's decision                 | <b>I</b>                   |
| Other                                                                                                          | <b>J</b>                   |

**IF E95=D AND E101=A, THEN Display Adverse Event Forms**

**[SHOW IF E100=A] FOR EACH PRODUCT SELECTED****E102. Why was dose delayed?**

|                                                                                                                | <i>Tick all that apply</i> |
|----------------------------------------------------------------------------------------------------------------|----------------------------|
| Dose-limiting toxicity / Side effects                                                                          | <b>A</b>                   |
| Prevention of future toxicity / Side effects (not yet dose-limiting before) per physician's guidance           | <b>B</b>                   |
| Prevention of future toxicity / Side effects (not yet dose-limiting before) per patient's or family's decision | <b>C</b>                   |
| Logistical reasons (hospital planning related)                                                                 | <b>D</b>                   |
| Logistical reasons (patient's or family's request)                                                             | <b>E</b>                   |
| Other                                                                                                          | <b>F</b>                   |

**IF E95K, E95L E95M, E95N OR E95 O = nal-IRI or Onivid or MM-398 AND E102=A, THEN Display Adverse Event Forms**

**[SHOW IF E100=B] FOR EACH PRODUCT SELECTED****E103. Why were doses reduced?**

|                                                                                                                | <i>Tick all that apply</i> |
|----------------------------------------------------------------------------------------------------------------|----------------------------|
| Dose-limiting toxicity / Side effects                                                                          | <b>A</b>                   |
| Prevention of future toxicity / Side effects (not yet dose-limiting before) per physician's guidance           | <b>B</b>                   |
| Prevention of future toxicity / Side effects (not yet dose-limiting before) per patient's or family's decision | <b>C</b>                   |
| No overall value of continued full treatment (overall risk-benefit) per physician's guidance                   | <b>D</b>                   |
| No overall value of continued full treatment (overall risk-benefit) per patient's/family's decision            | <b>E</b>                   |
| Other                                                                                                          | <b>F</b>                   |

**IF E95K, E95L E95M, E95N OR E95 O = nal-IRI or Onivid or MM-398 AND E103=A, THEN Display Adverse Event Forms**

[SHOW IF E3A>=3 OR E3B>=4]

E104. What was the performance status at start of 2<sup>nd</sup> line

| ECOG Grade | Karnofsky Grade | Tick only one           |
|------------|-----------------|-------------------------|
| 0          | 100             | <input type="radio"/> 1 |
| 1          | 80-90           | <input type="radio"/> 2 |
| 2          | 60-70           | <input type="radio"/> 3 |
| 3          | 40-50           | <input type="radio"/> 4 |
| 4          | 10-30           | <input type="radio"/> 5 |
| Unknown    |                 | <input type="radio"/> 6 |

For details on the ECOG and Karnofsky Grade, please click here. [INSERT LINK – APPENDIX 1]

[SHOW IF E3A>=3 OR E3B>=4]

E105. Please indicate level at start of 2nd line metastatic treatment

|   |           |              |                              | To be programmed |             |
|---|-----------|--------------|------------------------------|------------------|-------------|
|   |           |              |                              | MIN              | MAX         |
|   |           |              | <i>Tick if not performed</i> |                  |             |
| 1 | CA19-9    | _____ U/ml   |                              | 0                | 5000        |
| 2 | Albumin   | _____ g/l    |                              | 15 g/l           | 80 g/l      |
| 3 | Bilirubin | _____ IU/L   |                              | 0.1 IU/l         | 30,000 IU/L |
|   |           | _____ µmol/l |                              | 5 µmol /l        | 700 µmol/l  |

[IF OUTSIDE RANGES ASK] Can you please confirm this value?

YES / NO [IF YES GO TO NEXT QUESTION, IF NO GO BACK TO E104]

[SHOW IF E3A>=3 OR E3B>=4]

**E106. Best radiological response to treatment**

|                     | Tick only one           |
|---------------------|-------------------------|
| Complete response   | <input type="radio"/> 1 |
| Partial response    | <input type="radio"/> 2 |
| Stable disease      | <input type="radio"/> 3 |
| Progressive disease | <input type="radio"/> 4 |

[SHOW IF E3A>=3 OR E3B>=4]

**E107. Did the patient progress?**

|     | Tick only one           |
|-----|-------------------------|
| YES | <input type="radio"/> 1 |
| NO  | <input type="radio"/> 2 |

IF E95K, E95L E95M, E95N OR E95 O = nal-IRI or Onivid or MM-398  
AND E107=1, THEN Display Adverse Event Forms

Patient Record

**[SHOW IF E107=1]****E108. When was progression documented? (DD/MM/YYYY)**

|  |  |  |  |  |  |  |  |  |  |
|--|--|--|--|--|--|--|--|--|--|
|  |  |  |  |  |  |  |  |  |  |
|--|--|--|--|--|--|--|--|--|--|

**[Min => E91 ; Max 1/10/2015]****[SHOW IF E107=1]****E109. How was progression documented?**

|                | Tick only one           |
|----------------|-------------------------|
| Radiologically | <input type="radio"/> 1 |
| Clinically     | <input type="radio"/> 2 |
| Both           | <input type="radio"/> 3 |

**[SHOW IF E3A>=3 OR E3B>=4]****E110. Why was 2<sup>nd</sup> line treatment stopped?**

|                                                                                     | Tick all that apply |
|-------------------------------------------------------------------------------------|---------------------|
| Toxicity / Side effects                                                             | <b>A</b>            |
| Prevention of future toxicity / side-effects                                        | <b>B</b>            |
| Maximum cumulative dose reached                                                     | <b>C</b>            |
| Progressive disease (radiologically established)                                    | <b>D</b>            |
| Progressive disease (clinical progression)                                          | <b>E</b>            |
| Clinical deterioration necessitating stopping further treatment                     | <b>F</b>            |
| Absent overall risk-benefit of continued treatment (patient's or family's decision) | <b>G</b>            |
| Absent overall risk-benefit of continued treatment (physician's decision)           | <b>H</b>            |
| Treatment completed as per planning (received all planned cycles of the treatment)  | <b>I</b>            |
| Other                                                                               | <b>J</b>            |
| Death <b>[HIDE IF E3=1]</b>                                                         | <b>K</b>            |

**IF E95K, E95L E95M, E95N OR E95 O = nal-IRI or Onivid or MM-398  
AND E110=A, D, E, K THEN Display Adverse Event Forms**

[SHOW IF E3A>=6 OR E3>=7] SECTION 8 UP TO PAGE 70

### **Third line metastatic treatment**

E111. Start date of the 3rd line metastatic treatment (DD/MM/YYYY)          
[Min E92 ; Max today]

[SHOW IF E3A>=7 OR E3B>=8]

E112. End date of the 3rd line metastatic treatment (DD/MM/YYYY)          
[Min E111 ; Max today]

[SHOW IF E3A>=6 OR E3>=7]

E113. Was this treatment given in the context of a Clinical Trial?

| Tick only one |                         |
|---------------|-------------------------|
| Yes           | <input type="radio"/> 1 |
| No            | <input type="radio"/> 2 |

[SHOW IF E3A>=6 OR E3>=7]

E114. What treatment did the patient receive in 3<sup>rd</sup> line? Please select if one of the regimen below was used

|                       |               |
|-----------------------|---------------|
| INSERT SAME TABLE E24 | Tick only one |
|-----------------------|---------------|

Patient Record

**[SHOW IF E114=21]****E115. Please select what chemotherapeutic treatment the patient received in 3<sup>rd</sup> line.****Select as many agents as it applies. If you only select one compound, we understand that you used it in monotherapy.**

|                              |  |
|------------------------------|--|
| <b>INSERT SAME TABLE E25</b> |  |
|------------------------------|--|

**[SHOW IF E114=1 to 10]****Confirmation of regimen (selected in E114)**

|               |                                                                     |                                                         |
|---------------|---------------------------------------------------------------------|---------------------------------------------------------|
| <b>E114_0</b> | <b>Please confirm the regimen</b><br><b>INSERT SAME TABLE E24_1</b> | <b>Absolute dose given</b><br><b>in the first cycle</b> |
|---------------|---------------------------------------------------------------------|---------------------------------------------------------|



Patient Record

SHOW IF E3A>=6 OR E3>=7  
FOR PROGRAMMING PURPOSES, EACH REGIMEN IN E114 IS SPLIT INTO E115 VARIABLES.

## E116. INITIAL DOSE AND FREQUENCY REGIMEN

| Same table as E26 (change variables) | [[Only one unit per dose]                                                                                                                              | Frequency                                                         | Other Frequency (not listed) Specify | Absolute dose given in the first cycle |
|--------------------------------------|--------------------------------------------------------------------------------------------------------------------------------------------------------|-------------------------------------------------------------------|--------------------------------------|----------------------------------------|
| Paclitaxel <b>SHOW IF E114=A]</b>    | Dose: _____<br><input type="checkbox"/> mg / m2<br>If other unit used, please tick:<br><input type="checkbox"/> mg<br><input type="checkbox"/> mg / Kg | Frequency:<br><b>[Show dropdown: once weekly / every 3 weeks]</b> | <b>Open-end</b>                      | Total mg<br>_____ mg                   |
| Etc.                                 |                                                                                                                                                        |                                                                   |                                      |                                        |
| Etc.                                 |                                                                                                                                                        |                                                                   |                                      |                                        |

[SHOW IF E3A>=6 OR E3>=7]

E117. How many cycles did the patient receive?

 

[MIN 1-MAX 10]

[SHOW IF E3A>=6 OR E3>=7]

E118. Was the initial regimen modified (doses, delays, compound stopped)?

|                                              | Tick only one |
|----------------------------------------------|---------------|
| Yes, it was modified                         | 1             |
| No, it was maintained all through the cycles | 2             |

Patient Record

[SHOW IF E118=1 ]:

**E119. DOSING CHANGES**

Doctor, you mentioned that there were modifications in the therapy please indicate what product and in which cycle there were changes:

SHOW AS MANY COLUMNS AS E117

Tick all that apply– At least one tick

| SHOW PRODUCTS SELECTED (E114/) E115 | Cycle 1 | Cycle 2 | Cycle 2 | Cycle 3 | Etc. |  |  |
|-------------------------------------|---------|---------|---------|---------|------|--|--|
| Product 1                           | AA      | BA      | CA      | DA      |      |  |  |
| Product 2                           | AB      | BB      | CB      | DB      |      |  |  |
| Product 3                           | AC      | BC      | CC      | DC      |      |  |  |
| Product 4                           | AD      | BD      | CD      | DD      |      |  |  |
| Etc.                                |         |         |         |         |      |  |  |

**NEXT SCREEN]**

E120. Doctor, you mentioned that there were modifications in the therapy please indicate for each product and cycle the modifications.

| RECALL E119                            | Tick all that apply        | Specify                                                 | Total absolute dose for this cycle                                         |
|----------------------------------------|----------------------------|---------------------------------------------------------|----------------------------------------------------------------------------|
| Eg. IF AA TICKED<br>Product 1, cycle 1 | Dose delayed ○ <b>A</b>    | By how many days the dose was delayed _____             |                                                                            |
|                                        | Dose modified ○ <b>B</b>   | <b>RECALL PREVIOUS DOSE</b><br>Enter the new dose _____ | _____ Total mg<br>Tick box if other dosing unit:<br><b>INSERT OPEN END</b> |
|                                        | Product stopped ○ <b>C</b> |                                                         |                                                                            |
| Etc.                                   |                            |                                                         |                                                                            |
|                                        |                            |                                                         |                                                                            |

**[SHOW IF E120=C] FOR EACH PRODUCT SELECTED****E121. Why was one or more compounds stopped?**

|                                                                                                                | <i>Tick all that apply</i> |
|----------------------------------------------------------------------------------------------------------------|----------------------------|
| Dose-limiting toxicity / Side effects                                                                          | <b>A</b>                   |
| Prevention of future toxicity / Side effects (not yet dose-limiting before) per physician's guidance           | <b>B</b>                   |
| Prevention of future toxicity / Side effects (not yet dose-limiting before) per patient's or family's decision | <b>C</b>                   |
| Maximum cumulative dose reached                                                                                | <b>D</b>                   |
| Logistical reasons (hospital planning related)                                                                 | <b>E</b>                   |
| Logistical reasons (patient's or family's request)                                                             | <b>F</b>                   |
| No anti-tumour value of continued treatment per physician's guidance                                           | <b>G</b>                   |
| No overall value of continued treatment (overall risk-benefit) per physician's guidance                        | <b>H</b>                   |
| No overall value of continued treatment (overall risk-benefit) per patient's/family's decision                 | <b>I</b>                   |
| Other                                                                                                          | <b>J</b>                   |

**IF E115K, E115L E115M, E115N OR E115 O = nal-IRI or Onivid or MM-398 AND E121=A, THEN Display Adverse Event Forms**

**[SHOW IF E120=A]**

**E122. Why was dose delayed?**

|                                                                                                                | <i>Tick all that apply</i> |
|----------------------------------------------------------------------------------------------------------------|----------------------------|
| Dose-limiting toxicity / Side effects                                                                          | <b>A</b>                   |
| Prevention of future toxicity / Side effects (not yet dose-limiting before) per physician's guidance           | <b>B</b>                   |
| Prevention of future toxicity / Side effects (not yet dose-limiting before) per patient's or family's decision | <b>C</b>                   |
| Logistical reasons (hospital planning related)                                                                 | <b>D</b>                   |
| Logistical reasons (patient's or family's request)                                                             | <b>E</b>                   |
| Other                                                                                                          | <b>F</b>                   |

**IF E115K, E115L E115M, E115N OR E115 O = nal-IRI or Onivid or MM-398 AND E122=A, THEN Display Adverse Event Forms [SHOW IF E120=B]**

**E123. Why were doses reduced?**

|                                                                                                                | <i>Tick all that apply</i> |
|----------------------------------------------------------------------------------------------------------------|----------------------------|
| Dose-limiting toxicity / Side effects                                                                          | <b>A</b>                   |
| Prevention of future toxicity / Side effects (not yet dose-limiting before) per physician's guidance           | <b>B</b>                   |
| Prevention of future toxicity / Side effects (not yet dose-limiting before) per patient's or family's decision | <b>C</b>                   |
| No overall value of continued full treatment (overall risk-benefit) per physician's guidance                   | <b>D</b>                   |
| No overall value of continued full treatment (overall risk-benefit) per patient's/family's decision            | <b>E</b>                   |
| Other                                                                                                          | <b>F</b>                   |

**IF E115K, E115L E115M, E115N OR E115 O = nal-IRI or Onivid or MM-398 AND E123=A, THEN Display Adverse Event Forms**

[SHOW IF E3A>=6 OR E3>=7]

E124. What was the performance status at start of 3rd line

| ECOG Grade | Karnofsky Grade | Tick only one           |
|------------|-----------------|-------------------------|
| 0          | 100             | <input type="radio"/> 1 |
| 1          | 80-90           | <input type="radio"/> 2 |
| 2          | 60-70           | <input type="radio"/> 3 |
| 3          | 40-50           | <input type="radio"/> 4 |
| 4          | 10-30           | <input type="radio"/> 5 |
| Unknown    |                 | <input type="radio"/> 6 |

For details on the ECOG and Karnofsky Grade, please click here. [INSERT LINK – APPENDIX 1]

[SHOW IF E3A>=6 OR E3>=7]

E125. Please indicate level at start of 3rd line metastatic treatment

|   |           |              |  | To be programmed      |             |
|---|-----------|--------------|--|-----------------------|-------------|
|   |           |              |  | MIN                   | MAX         |
|   |           |              |  | Tick if not performed |             |
| 1 | CA19-9    | _____ U/ml   |  | 0                     | 5000        |
| 2 | Albumin   | _____ g/l    |  | 15 g/l                | 80 g/l      |
| 3 | Bilirubin | _____ IU/L   |  | 0.1 IU/l              | 30,000 IU/L |
|   |           | _____ µmol/l |  | 5 µmol /l             | 700 µmol/l  |

[IF OUTSIDE ranges ASK] Can you please confirm this value?

YES / NO [IF YES GO TO NEXT QUESTION, IF NO GO BACK TO E125]

[SHOW IF E3A>=6 OR E3>=7]

**E126. Best radiological response to treatment**

|                     | Tick only one           |
|---------------------|-------------------------|
| Complete response   | <input type="radio"/> 1 |
| Partial response    | <input type="radio"/> 2 |
| Stable disease      | <input type="radio"/> 3 |
| Progressive disease | <input type="radio"/> 4 |

[SHOW IF E3A>=6 OR E3>=7]

**E127. Did the patient progress?**

|     | Tick only one           |
|-----|-------------------------|
| YES | <input type="radio"/> 1 |
| NO  | <input type="radio"/> 2 |

IF E115K, E115L E115M, E115N OR E115 O = nai-IRI or Onivid or MM-398  
AND E127=1, THEN Display Adverse Event Forms

Patient Record

[\[SHOW IF E127=1 \]](#)

E128. When was progression documented? (DD/MM/YYYY)

|  |  |  |  |  |  |  |  |
|--|--|--|--|--|--|--|--|
|  |  |  |  |  |  |  |  |
|--|--|--|--|--|--|--|--|

[\[Min => E111 ; Max 1/10/2015\]](#)[\[SHOW IF E127=1 \]](#)

E129. How was progression documented?

|                | Tick only one           |
|----------------|-------------------------|
| Radiologically | <input type="radio"/> 1 |
| Clinically     | <input type="radio"/> 2 |
| Both           | <input type="radio"/> 3 |

[\[SHOW IF E3A>=6 OR E3>=7\]](#)E130. Why was 3<sup>rd</sup> line treatment stopped?

|                                                                                     | Tick all that apply        |
|-------------------------------------------------------------------------------------|----------------------------|
| Toxicity / Side effects                                                             | <input type="checkbox"/> A |
| Prevention of future toxicity / side-effects                                        | <input type="checkbox"/> B |
| Maximum cumulative dose reached                                                     | <input type="checkbox"/> C |
| Progressive disease (radiologically established)                                    | <input type="checkbox"/> D |
| Progressive disease (clinical progression)                                          | <input type="checkbox"/> E |
| Clinical deterioration necessitating stopping further treatment                     | <input type="checkbox"/> F |
| Absent overall risk-benefit of continued treatment (patient's or family's decision) | <input type="checkbox"/> G |
| Absent overall risk-benefit of continued treatment (physician's decision)           | <input type="checkbox"/> H |
| Treatment completed as per planning (received all planned cycles of the treatment)  | <input type="checkbox"/> I |
| Other                                                                               | <input type="checkbox"/> J |
| Death <a href="#">[HIDE IF E3=1]</a>                                                | <input type="checkbox"/> K |

[IF E115K, E115L E115M, E115N OR E115 O = nal-IRI or Onivid or MM-398 AND E130=A, D, E, K THEN Display Adverse Event Forms](#)

[\[GO BACK TO DASHBOARD\]](#)

[\[LINK ECOG\]](#)**ECOG SCALE**

| <b>Karnofsky Status</b>                                                | <b>Karnofsky Grade</b> | <b>ECOG Grade</b> | <b>ECOG</b>                                                                                                                                               |
|------------------------------------------------------------------------|------------------------|-------------------|-----------------------------------------------------------------------------------------------------------------------------------------------------------|
| Normal, no complaints                                                  | 100                    | 0                 | Fully active, able to carry on all pre-disease performance without restriction                                                                            |
| Able to carry on normal activities. Minor signs or symptoms of disease | 90                     | 1                 | Restricted in physically strenuous activity but ambulatory and able to carry out work of a light or sedentary nature, e.g., light house work, office work |
| Normal activity with effort                                            | 80                     | 1                 | Restricted in physically strenuous activity but ambulatory and able to carry out work of a light or sedentary nature, e.g., light house work, office work |
| Care for self. Unable to carry on normal activity or to do active work | 70                     | 2                 | Ambulatory and capable of all selfcare but unable to carry out any work activities. Up and about more than 50% of waking hours                            |
| Requires occasional assistance, but able to care for most of his needs | 60                     | 2                 | Ambulatory and capable of all selfcare but unable to carry out any work activities. Up and about more than 50% of waking hours                            |
| Requires considerable assistance and frequent medical care             | 50                     | 3                 | Capable of only limited selfcare, confined to bed or chair more than 50% of waking hours                                                                  |
| Disabled. Requires special care and assistance                         | 40                     | 3                 | Capable of only limited selfcare, confined to bed or chair more than 50% of waking hours                                                                  |
| Severely disabled. Hospitalisation indicated though death nonimminent  | 30                     | 4                 | Completely disabled. Cannot carry on any selfcare. Totally confined to bed or chair                                                                       |
| Very sick. Hospitalisation necessary. Active supportive treatment      | 20                     | 4                 | Completely disabled. Cannot carry on any selfcare. Totally confined to bed or chair                                                                       |



|           |    |   |                                                                                     |
|-----------|----|---|-------------------------------------------------------------------------------------|
| necessary |    |   |                                                                                     |
| Moribund  | 10 | 4 | Completely disabled. Cannot carry on any selfcare. Totally confined to bed or chair |
| Dead      | 0  | 5 | Dead                                                                                |
