# Supplementary material for: First-line and second-line treatment of patients with metastatic pancreatic adenocarcinoma in routine clinical practice across Europe: a retrospective, observational chart review study
Source: PubMed Central journal article supplement — ESMO Open. 2020 Jan 20;5(1):e000587. doi: 10.1136/esmoopen-2019-000587 (PMC7003396; doi:10.1136/esmoopen-2019-000587), 2020-01-20
Supplement: esmoopen-2019-000587supp003.pdf [file esmoopen-2019-000587supp003.pdf]

**Supplementary table 1:** Patient demographics and characteristics at diagnosis of metastatic disease

|                                       | <b>Total<br/>(N=2,565)</b> | <b>France<br/>(n=504)</b> | <b>Germany<br/>(n=504)</b> | <b>Italy<br/>(n=500)</b> | <b>Spain<br/>(n=504)</b> | <b>UK<br/>(n=504)</b> |
|---------------------------------------|----------------------------|---------------------------|----------------------------|--------------------------|--------------------------|-----------------------|
| <b>Age, n (%)</b>                     |                            |                           |                            |                          |                          |                       |
| ≤65 years old,                        | 1,426 (55.6)               | 243 (48.2)                | 253 (50.2)                 | 270 (54.0)               | 318 (63.1)               | 310 (61.5)            |
| >65 years old                         | 1,139 (44.4)               | 261 (51.8)                | 251 (49.8)                 | 230 (46.0)               | 186 (36.9)               | 194 (38.5)            |
| <b>Gender, n (%)</b>                  |                            |                           |                            |                          |                          |                       |
| Male                                  | 1,479 (57.7)               | 303 (60.1)                | 293 (58.1)                 | 278 (55.6)               | 281 (55.8)               | 295 (58.5)            |
| Female                                | 1,086 (42.3)               | 201 (39.9)                | 211 (41.9)                 | 222 (44.4)               | 223 (44.2)               | 209 (41.5)            |
| <b>Primary Tumour Location, n (%)</b> |                            |                           |                            |                          |                          |                       |
| Head                                  | 1,030 (40.2)               | 196 (38.9)                | 212 (42.1)                 | 200 (40.0)               | 195 (38.7)               | 207 (41.1)            |
| Body                                  | 594 (23.2)                 | 114 (22.6)                | 119 (23.6)                 | 98 (19.6)                | 115 (22.8)               | 142 (28.2)            |
| Tail                                  | 259 (10.1)                 | 55 (10.9)                 | 46 (9.1)                   | 37 (7.4)                 | 67 (13.3)                | 51 (10.1)             |
| Head/body                             | 417 (16.3)                 | 88 (17.5)                 | 75 (14.9)                  | 79 (15.8)                | 90 (17.9)                | 71 (14.1)             |
| Body/tail                             | 246 (9.6)                  | 46 (9.1)                  | 51 (10.1)                  | 83 (16.6)                | 35 (6.9)                 | 26 (5.2)              |
| Unknown                               | 19 (0.7)                   | 5 (1.0)                   | 1 (0.2)                    | 3 (0.6)                  | 2 (0.4)                  | 7 (1.4)               |
| <b>ECOG Performance Status, n (%)</b> |                            |                           |                            |                          |                          |                       |
| 0                                     | 366 (14.3)                 | 49 (9.7)                  | 53 (10.5)                  | 132 (26.4)               | 53 (10.5)                | 65 (12.9)             |
| 1                                     | 1,424 (55.5)               | 234 (46.4)                | 270 (53.6)                 | 272 (54.4)               | 283 (56.2)               | 339 (67.3)            |
| 2                                     | 691 (26.9)                 | 196 (38.9)                | 147 (29.2)                 | 90 (18.0)                | 158 (31.3)               | 92 (18.3)             |
| 3                                     | 66 (2.6)                   | 24 (4.8)                  | 26 (5.2)                   | 6 (1.2)                  | 10 (2.0)                 | 0                     |
| 4                                     | 4 (0.2)                    | 1 (0.2)                   | 3 (0.6)                    | 0                        | 0                        | 0                     |
| Unknown                               | 14 (0.5)                   | 0                         | 5 (1.0)                    | 0                        | 0                        | 8 (1.6)               |

|                                |                 |                |                |                |                |                |
|--------------------------------|-----------------|----------------|----------------|----------------|----------------|----------------|
| <b>Median CA19-9, U/mL</b>     | 274<br>(N=298)  | 203<br>(n=35)  | 441<br>(n=90)  | 206<br>(n=74)  | 267<br>(n=48)  | 265<br>(n=45)  |
| <b>Median albumin, g/L</b>     | 32.0<br>(N=216) | 32.0<br>(n=28) | 33.0<br>(n=62) | 34.0<br>(n=30) | 31.0<br>(n=41) | 31.0<br>(n=49) |
| <b>Median bilirubin, mg/dL</b> | 1.08<br>(N=280) | 0.89<br>(n=30) | 1.30<br>(n=92) | 1.00<br>(n=59) | 1.06<br>(n=43) | 0.89<br>(n=49) |

ECOG, Eastern Cooperative Oncology Group

**Supplementary table 2:** Geographic variation in first-line treatment regimen choices

| First-line treatment/% patients       | Total<br>(N=2,565) | France<br>(n=504) | Germany<br>(n=504) | Italy<br>(n=500) | Spain<br>(n=504) | UK<br>(n=504) |
|---------------------------------------|--------------------|-------------------|--------------------|------------------|------------------|---------------|
| <b>5-FU-based</b>                     | 43.4               | 55.2              | 42.7               | 35.0             | 38.5             | 45.4          |
| <b>FOLFIRINOX</b>                     | 35.6               | 47.4              | 33.5               | 27.2             | 29.0             | 40.1          |
| Full dose FOLFIRINOX                  | 28.1               | 40.9              | 29.6               | 19.0             | 22.6             | 27.8          |
| Modified FOLFIRINOX                   | 7.4                | 6.5               | 4.0                | 8.2              | 6.3              | 12.3          |
| <b>Other 5-FU-based</b>               | 7.9                | 7.7               | 9.1                | 7.8              | 9.5              | 5.4           |
| 5-FU+oxaliplatin                      | 5.0                | 4.6               | 6.5                | 5.0              | 5.6              | 3.2           |
| 5-FU+irinotecan                       | 0.8                | 1.4               | 0.8                | 0.4              | 1.0              | 0.2           |
| 5-FU monotherapy                      | 2.1                | 1.8               | 1.8                | 2.4              | 3.0              | 2.0           |
| <b>Gemcitabine-based</b>              | 55.4               | 44.8              | 57.3               | 61.8             | 59.5             | 53.8          |
| <b>Gemcitabine+nab-paclitaxel</b>     | 25.7               | 10.9              | 31.0               | 36.4             | 32.7             | 17.9          |
| <b>Gemcitabine monotherapy</b>        | 20.5               | 26.8              | 15.9               | 19.8             | 17.9             | 23.4          |
| <b>Other gemcitabine combinations</b> | 9.2                | 7.1               | 10.5               | 5.6              | 8.9              | 12.5          |
| Gemcitabine+erlotinib                 | 1.8                | 0.0               | 6.2                | 0.0              | 2.8              | 0.2           |
| Gemcitabine+capecitabine              | 3.2                | 0.0               | 1.2                | 0.6              | 3.8              | 9.3           |
| Gemcitabine+oxaliplatin               | 3.1                | 6.7               | 2.0                | 4.4              | 2.2              | 0.4           |
| Gemcitabine+cisplatin                 | 1.0                | 0.4               | 1.2                | 0.6              | 0.2              | 2.6           |
| <b>Other</b>                          | 1.2                | 0.0               | 0.0                | 3.2              | 2.0              | 0.8           |

5-FU, 5-fluorouracil; FOLFIRINOX, folinic acid, fluorouracil, irinotecan and oxaliplatin.

**Supplementary table 3:** Patients demographics and characteristics in first-line gemcitabine+nab-paclitaxel or FOLFIRINOX treatment (France, Germany, Italy, Spain and the UK patient populations)

| Patients (%)                   | First-line gemcitabine+nab-paclitaxel | First-line FOLFIRINOX |             |              |                |                            |
|--------------------------------|---------------------------------------|-----------------------|-------------|--------------|----------------|----------------------------|
|                                |                                       | All                   | mFOLFIRINOX | fFOLFIRINOX  |                |                            |
|                                |                                       |                       |             | All          | Never modified | Modified in cycle $\geq 2$ |
| <b>France</b>                  | <b>n=55</b>                           | <b>n=239</b>          | <b>n=33</b> | <b>n=206</b> | <b>n=169</b>   | <b>n=37</b>                |
| With dose adjustment           | 9.1                                   | 16.7                  | 9.1         | 18.0         | 0.0            | 100.0                      |
| >65 years old                  | 47.3                                  | 33.1                  | 27.3        | 34.0         | 33.1           | 37.8                       |
| Female                         | 45.5                                  | 36.0                  | 36.4        | 35.9         | 33.1           | 48.6                       |
| ECOG PS 0–1                    | 54.5                                  | 74.5                  | 66.7        | 75.7         | 76.3           | 73.0                       |
| Received second-line treatment | 50.9                                  | 88.3                  | 90.9        | 87.9         | 89.9           | 78.4                       |
| Median OS/PFS (months)         | 10/6                                  | 13/9                  | NR*         | 13/9         | 13/9           | NR*                        |
| <b>Germany</b>                 | <b>n=156</b>                          | <b>n=169</b>          | <b>n=16</b> | <b>n=153</b> | <b>n=129</b>   | <b>n=24</b>                |
| With dose adjustment           | 9.0                                   | 14.2                  | 0.0         | 15.7         | 0.0            | 100.0                      |
| >65 years old                  | 60.3                                  | 19.5                  | 37.5        | 17.6         | 17.1           | 20.8                       |
| Female                         | 43.6                                  | 30.8                  | 50.0        | 28.8         | 27.9           | 33.3                       |
| ECOG PS 0–1                    | 67.3                                  | 92.3                  | 100.0       | 91.5         | 91.5           | 91.7                       |
| Received second-line treatment | 66.7                                  | 80.5                  | 75.0        | 81.0         | 80.6           | 83.3                       |
| Median OS/PFS (months)         | 12/7                                  | 20/22                 | NR*         | 20/22        | 20/22          | NR*                        |
| <b>Italy</b>                   | <b>n=182</b>                          | <b>n=136</b>          | <b>n=35</b> | <b>n=101</b> | <b>n=64</b>    | <b>n=37</b>                |
| With dose adjustment           | 24.7                                  | 27.9                  | 2.9         | 36.6         | 0.0            | 100                        |
| >65 years old                  | 43.4                                  | 20.6                  | 11.4        | 23.8         | 18.8           | 32.4                       |

| Patients (%)                   | First-line<br>gemcitabine+<br>nab-paclitaxel | First-line FOLFIRINOX |             |              |                |                         |
|--------------------------------|----------------------------------------------|-----------------------|-------------|--------------|----------------|-------------------------|
|                                |                                              | All                   | mFOLFIRINOX | fFOLFIRINOX  |                |                         |
|                                |                                              |                       |             | All          | Never modified | Modified in cycle<br>≥2 |
| Female                         | 45.1                                         | 37.5                  | 37.1        | 37.6         | 37.5           | 37.8                    |
| ECOG PS 0–1                    | 86.3                                         | 95.6                  | 97.1        | 95.0         | 96.9           | 91.9                    |
| Received second-line treatment | 58.2                                         | 68.4                  | 74.3        | 66.3         | 62.5           | 73.0                    |
| Median OS/PFS (months)         | 12/7                                         | 18/10                 | NR*         | 18/10        | 17/9           | NR*                     |
| <b>Spain</b>                   | <b>n=165</b>                                 | <b>n=146</b>          | <b>n=29</b> | <b>n=117</b> | <b>n=82</b>    | <b>n=35</b>             |
| With dose adjustment           | 25.5                                         | 26.0                  | 10.3        | 30.0         | 0.0            | 100.0                   |
| >65 years old                  | 37.0                                         | 19.2                  | 10.3        | 21.4         | 23.2           | 17.1                    |
| Female                         | 41.2                                         | 39.7                  | 48.3        | 37.6         | 36.6           | 40.0                    |
| ECOG PS 0–1                    | 73.3                                         | 87.0                  | 96.6        | 84.6         | 81.7           | 91.4                    |
| Received second-line treatment | 80.6                                         | 75.3                  | 72.4        | 76.1         | 76.8           | 74.3                    |
| Median OS/PFS (months)         | 12/7                                         | 17/16                 | NR*         | 16/11        | 13/10          | NR*                     |
| <b>UK</b>                      | <b>n=90</b>                                  | <b>n=202</b>          | <b>n=48</b> | <b>n=154</b> | <b>n=103</b>   | <b>n=51</b>             |
| With dose adjustment           | 26.7                                         | 26.2                  | 4.2         | 33.1         | 0.0            | 100.0                   |
| >65 years old                  | 34.4                                         | 23.3                  | 14.6        | 26.0         | 23.3           | 31.4                    |
| Female                         | 40.0                                         | 38.6                  | 43.8        | 37.0         | 33.0           | 45.1                    |
| ECOG PS 0–1                    | 90.0                                         | 94.9                  | 93.6        | 95.3         | 94.9           | 96.1                    |
| Received second-line treatment | 72.2                                         | 74.3                  | 77.1        | 73.4         | 72.8           | 74.5                    |
| Median OS/PFS (months)         | 14/7                                         | 15/8                  | 15/8        | 14/8         | 15/10          | NR*                     |

\*OS/PFS not calculated due to small sample size

ECOG, Eastern Cooperative Oncology Group; FOLFIRINOX, folinic acid, fluorouracil, irinotecan and oxaliplatin; NA, not applicable; NR, not reported; OS, overall survival; PFS, progression-free survival; PS, performance status.

**Supplementary table 4:** Reimbursement status of treatments in EU countries involved in this observational study

|                       | Treatment reimbursed |         |       |       |     |
|-----------------------|----------------------|---------|-------|-------|-----|
|                       | France               | Germany | Italy | Spain | UK  |
| <b>Gemcitabine</b>    | Yes                  | Yes     | Yes   | Yes   | Yes |
| <b>5-fluorouracil</b> | Yes                  | Yes     | Yes   | Yes   | Yes |
| <b>Irinotecan</b>     | Yes                  | Yes     | Yes   | Yes   | Yes |
| <b>Oxaliplatin</b>    | Yes                  | Yes     | Yes   | Yes   | Yes |
| <b>Capecitabine</b>   | Yes                  | Yes     | Yes   | Yes   | Yes |
| <b>Cisplatin</b>      | Yes                  | Yes     | Yes   | Yes   | Yes |
| <b>nab-paclitaxel</b> | Yes                  | Yes     | Yes   | Yes   | No  |

Adapted from Cherny *et al.* (2016) (11).

**Supplementary figure 1:** Flow chart describing physician recruitment and patient record collection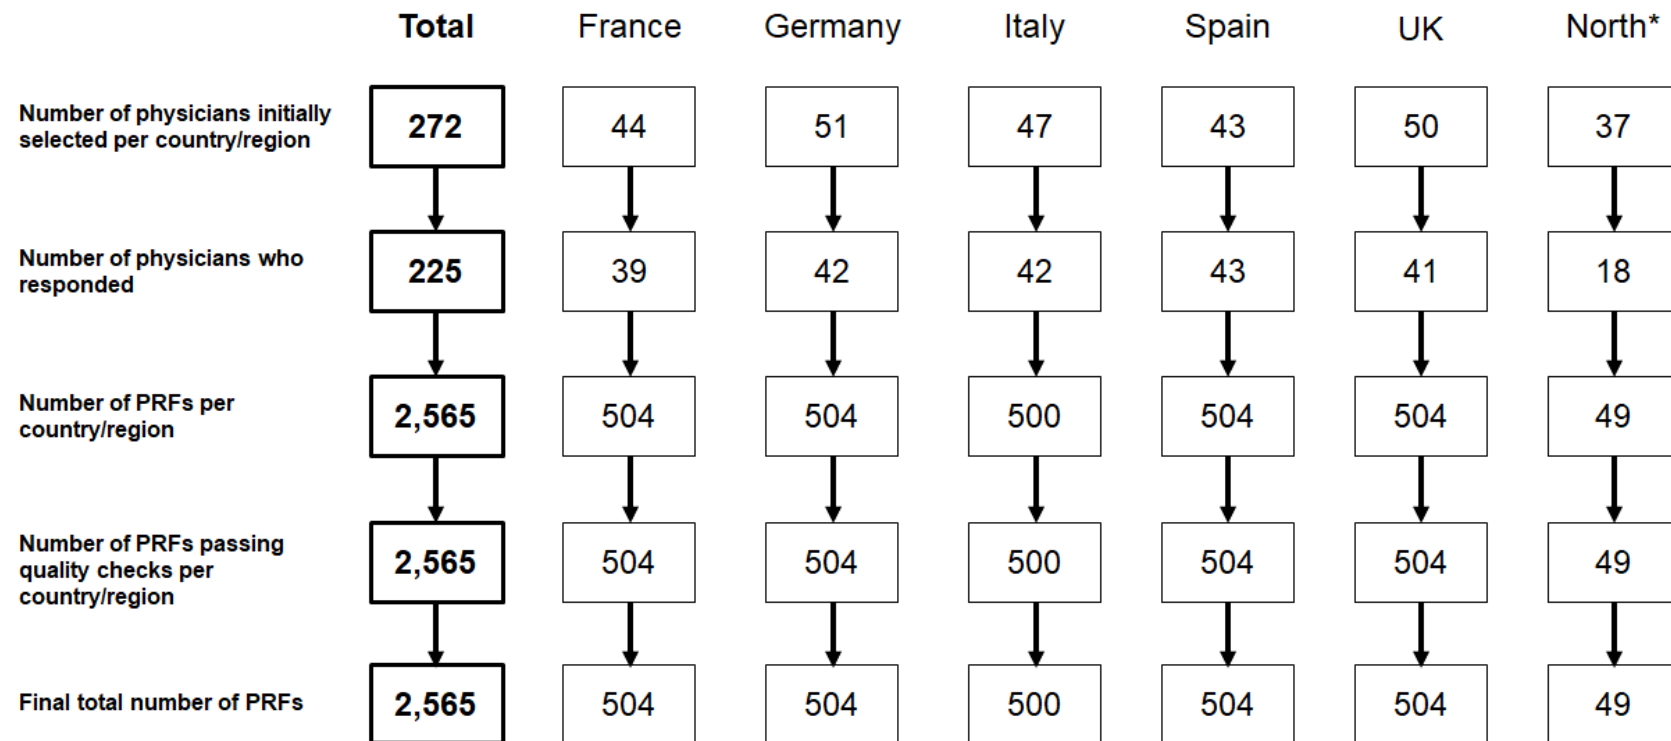

\*North region includes the Netherlands, Denmark, Norway and Sweden

PRF, patient record form.

**Supplementary figure 2: Use of A) 5-fluorouracil-based treatments and B) gemcitabine-based treatments in the first-line setting**

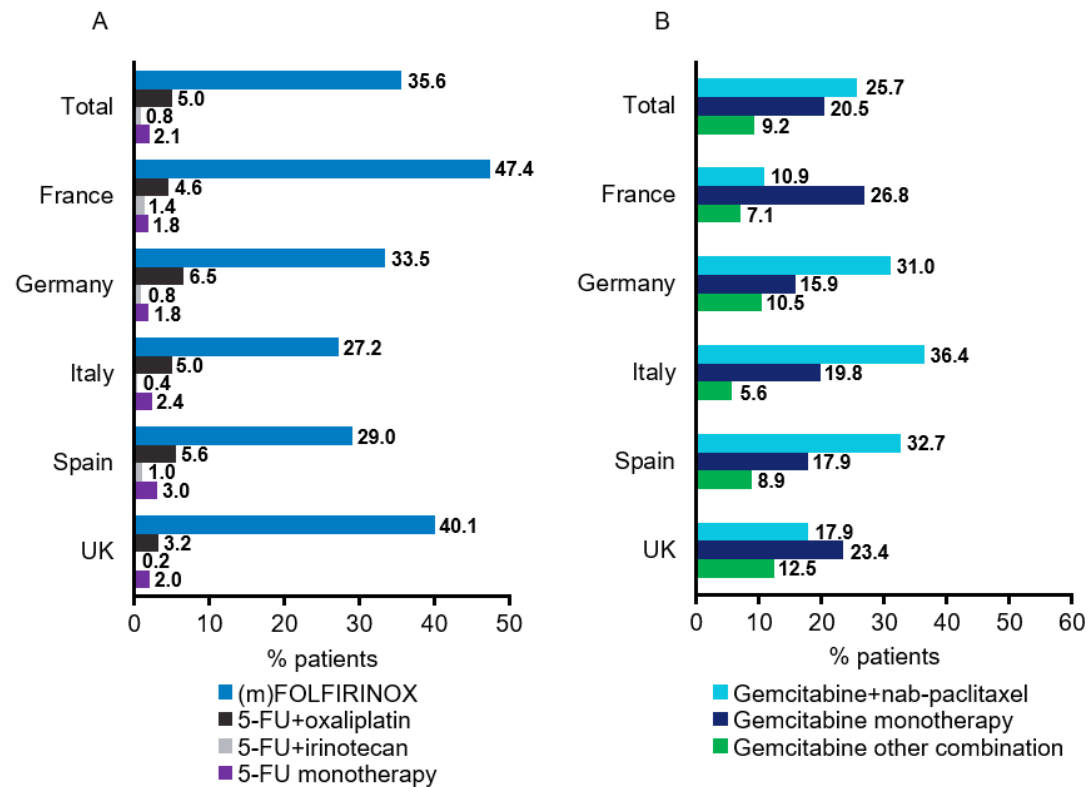

\*(m)FOLFIRINOX includes full-dose and modified FOLFIRINOX.

5-FU, 5-fluorouracil; FOLFIRINOX, folinic acid, fluorouracil, irinotecan and oxaliplatin.



**Supplementary figure 3: Use of modified and full-dose FOLFIRINOX in first line treatment**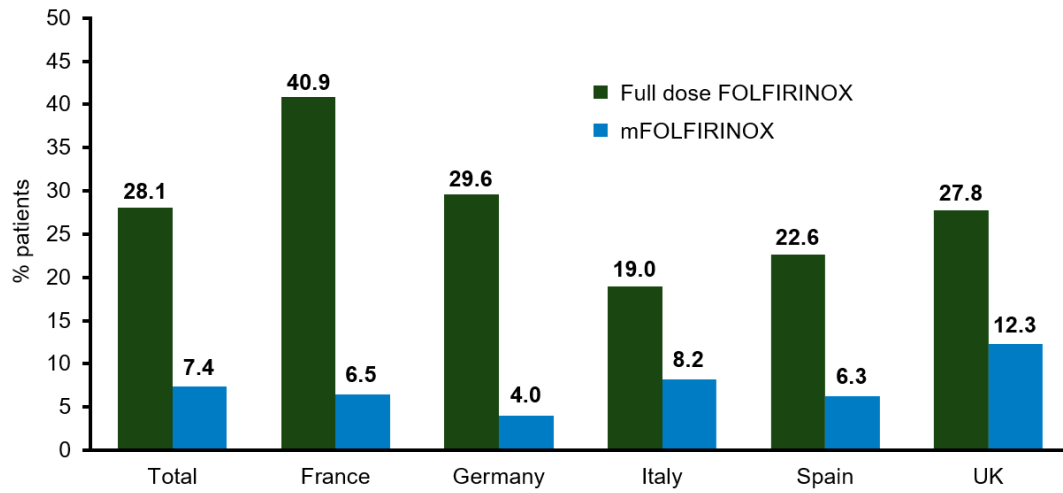

FOLFIRINOX, folinic acid, fluorouracil, irinotecan and oxaliplatin; m, modified.

**Supplementary figure 4:** First-line FOLFIRINOX and gemcitabine+nab-paclitaxel dose modifications

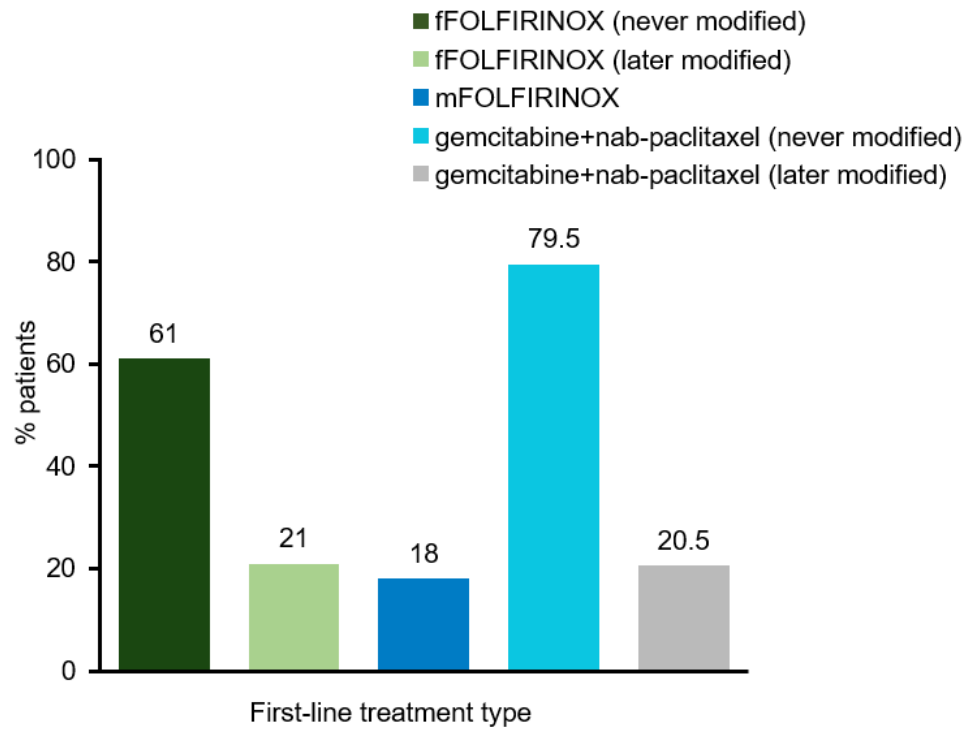

fFOLFIRINOX, full-dose folinic acid, fluorouracil, irinotecan and oxaliplatin; mFOLFIRINOX, modified folinic acid, fluorouracil, irinotecan and oxaliplatin.

**Supplementary figure 5:** Overall survival based on first-line A) mFOLFIRINOX treatment (modified at any time point), B) gemcitabine+nab-paclitaxel treatment or C) gemcitabine monotherapy

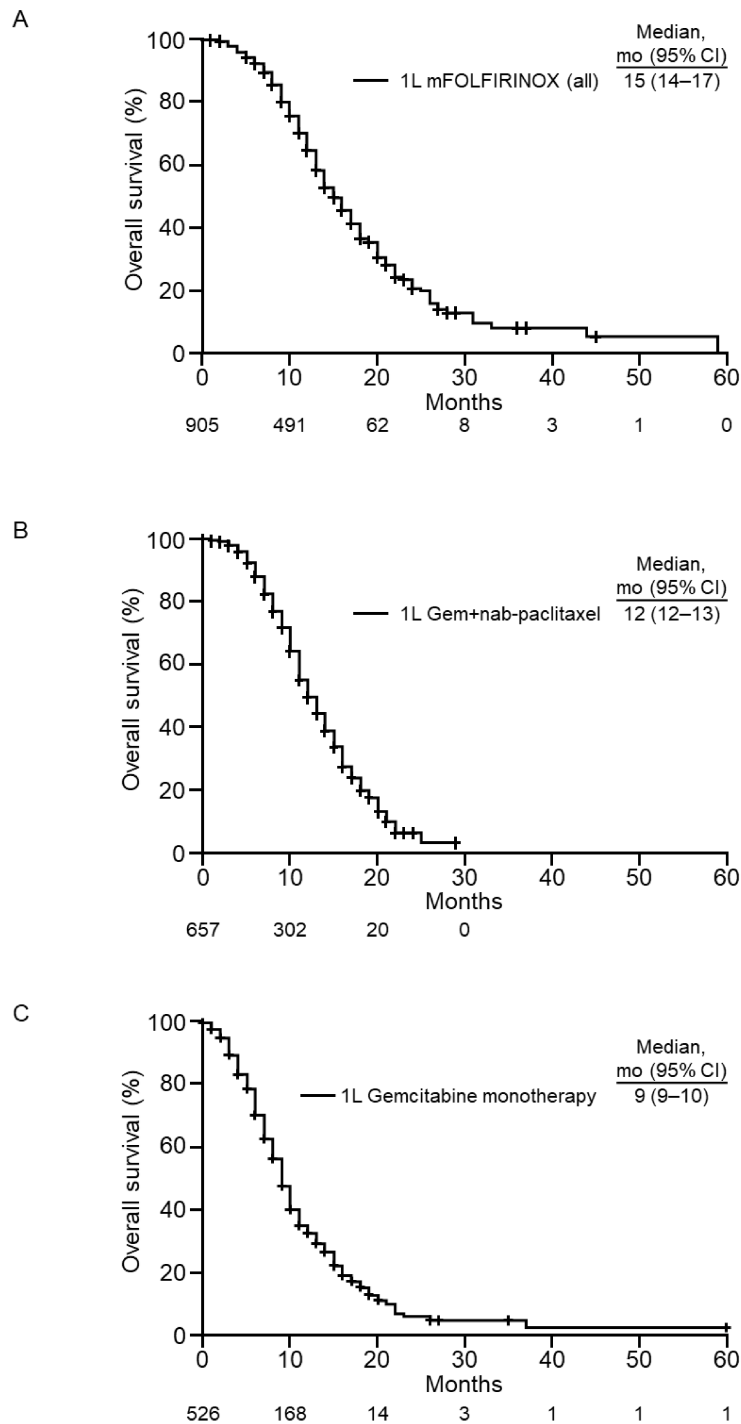

CI, confidence interval; mFOLFIRINOX, modified folinic acid, fluorouracil, irinotecan and oxaliplatin.

**Supplementary figure 6:** Overall survival based on first-line FOLFIRINOX dose at start of treatment

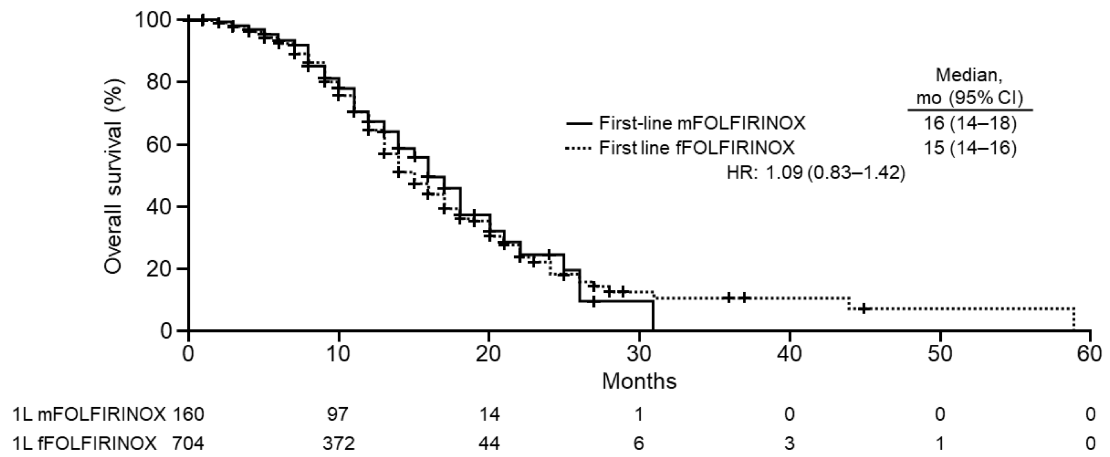

CI, confidence interval; fFOLFIRINOX, full-dose folinic acid, fluorouracil, irinotecan and oxaliplatin;

HR, hazard ratio; mFOLFIRINOX, modified folinic acid, fluorouracil, irinotecan and oxaliplatin.

**Supplementary figure 7:** Second-line treatment patterns by first-line treatment (n=1,666)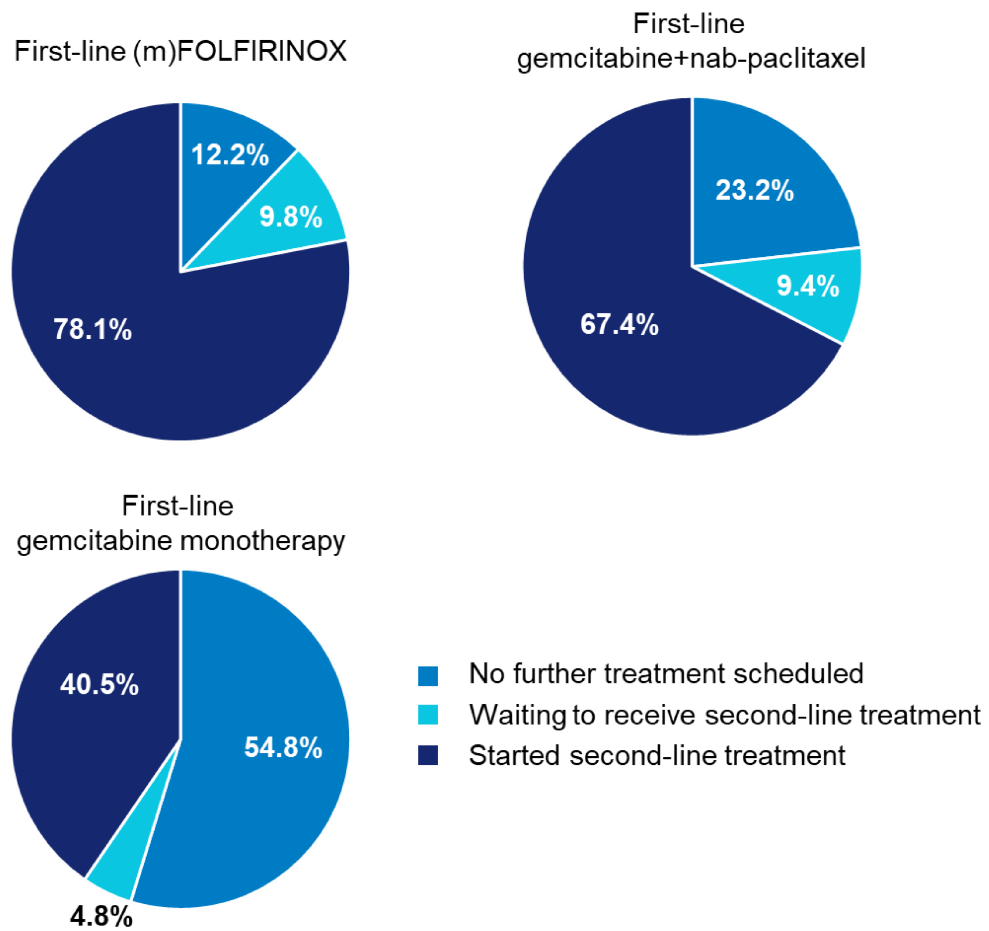

**Supplementary figure 8:** Overall breakdown of second-line treatment choices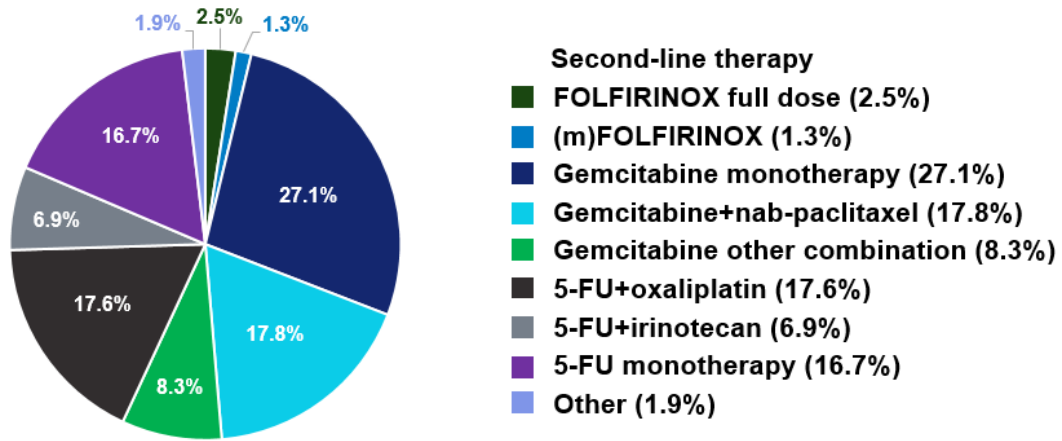

5-FU, 5-fluorouracil; FOLFIRINOX, folinic acid, fluorouracil, irinotecan and oxaliplatin.

**Supplementary figure 9:** Use of A) 5-fluorouracil-based treatments and B) gemcitabine-based treatments in the second-line setting

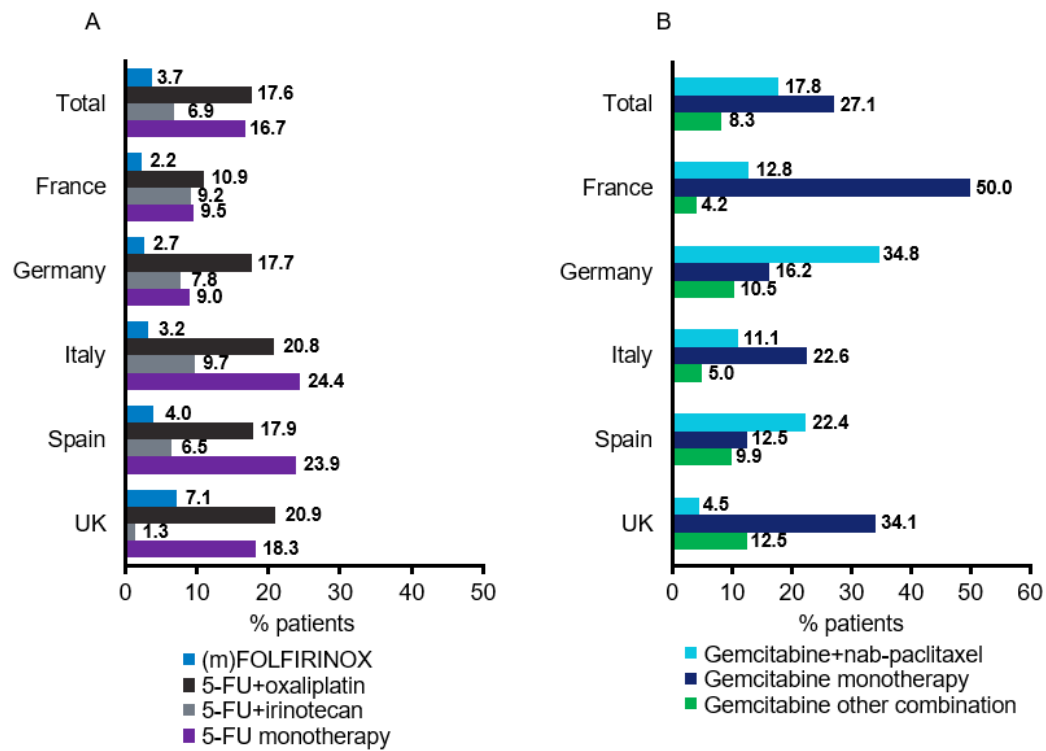

\*(m)FOLFIRINOX includes full-dose and modified FOLFIRINOX.

5-FU, 5-fluorouracil; FOLFIRINOX, folinic acid, fluorouracil, irinotecan and oxaliplatin.
